# Supplementary material
Source: Elsevier journal article supplement (https://www.sciencedirect.com/science/article/pii/S2530064421000912)
Supplement: mmc1 [file S2530064421000912:mmc1.xlsx]

## Sheet: ALL
Title	Author	Start_Date	End_Date	Midpoint	Publicatio	Source	Volume	Issue	Beg_page	End_page	Order_	Family	Genus	Species	Body Mass	Home Range	Age	Latitude	Longitude	TotalMortality	KnownMortality	Anthropogenic	Harvest	Vehicle	Predation
Characteristics of kangaroo rats associated with differential predation risk	Daly	1980	1990	1985	1990	Animal Behaviour	40	2	380	389	Rodentia	Heteromyidae	Dipodomys	merriami	37.6	0.00159	Adult	33.6795	-116.372	50	50	0	0	0	50
Mortality of Adult White-Tailed Deer in South Texas	DeYoung	1984	1986	1985	1989	The Journal of Wildlife Management	53	3	513	518	Artiodactyla	Cervidae	Odocoileus	virginianus	75000	1.84	Adult	28.3776	-98.513	23	13	8	8	0	5
Effects of Wolf Predation on Recruitment o Black-Tailed Deer on Northeastern Vancouver Island	Hatter	1982	1988	1985	1988	British Columbia Ministry of Environment Wildlife Report No. R-23	0	0	1	82	Artiodactyla	Cervidae	Odocoileus	hemionus	83800	1.99	Juvenile	49.7865	-125.749	14	14	2	1	1	9
Demographic analysis of a Black Bear Population in the Great Dismal Swamp	Hellgren	1984	1986	1985	1989	The Journal of Wildlife Management	53	4	969	977	Carnivora	Ursidae	Ursus	americanus	111000	27.9	Adult	36.5625	-76.4705	16	16	15	10	3	1
Characteristics of a Hunted Population of Cougars in Southwestern Alberta	Ross	1981	1989	1985	1992	The Journal of Wildlife Management	56	3	417	426	Carnivora	Felidae	Puma	concolor	53900	118	Adult	50.645	-114.629	16	13	11	11	0	0
Characteristics of a Hunted Population of Cougars in Southwestern Alberta	Ross	1981	1989	1985	1992	The Journal of Wildlife Management	56	3	417	426	Carnivora	Felidae	Puma	concolor	53900	118	Juvenile	50.645	-114.629	11	11	7	7	0	0
Shooting Mortality in Small Populations of Grizzly Bears	Knick	1983	1987	1985	1989	Wildlife Society Bulletin	17	1	11	15	Carnivora	Ursidae	Ursus	arctos	196000	282	Adult	47.9852	-116.974	5	5	5	4	0	0
Survival and movements of orphaned white-tailed deer fawns in Texas	Giuliano	1985	1986	1985.5	1999	The Journal of Wildlife Management	63	2	570	574	Artiodactyla	Cervidae	Odocoileus	virginianus	75000	1.84	Juvenile	28.264	-99.5954	3	3	0	0	0	0
Details of Extensive Movements by Minnesota Wolves	Merrill	1973	1998	1985.5	2000	The American Midland Natrualist	144	2	428	433	Carnivora	Canidae	Canis	lupus	35000	21.8	Adult	47.8673	-91.7173	1	1	1	1	0	0
The Influence of a Small Sanctuary on Survival Rates of Black Bears in North Carolina	Beringer	1982	1989	1985.5	1998	The Journal of Wildlife Management	62	2	727	734	Carnivora	Ursidae	Ursus	americanus	111000	27.9	Adult	35.7259	-82.9966	21	8	8	8	0	0
Home Range, Habitat Use, and Mortality of Black Bears in North-Central Florida	Wooding	1983	1988	1985.5	1994	Bears: Their Bio and Manage	9	1	349	356	Carnivora	Ursidae	Ursus	americanus	111000	27.9	Adult	30.2654	-82.4333	1	1	1	1	0	0
The Influence of a Small Sanctuary on Survival Rates of Black Bears in North Carolina	Beringer	1982	1989	1985.5	1998	The Journal of Wildlife Management	62	2	727	734	Carnivora	Ursidae	Ursus	americanus	111000	27.9	Juvenile	35.7259	-82.9966	18	14	14	14	0	0
Factors Affecting Black Bear Reproductive Success and Cub Survival	Elowe	1984	1987	1985.5	1989	The Journal of Wildlife Management	53	4	962	968	Carnivora	Ursidae	Ursus	americanus	111000	27.9	Juvenile	42.5	-72.75	21	21	9	8	1	0
Home Range, Habitat Use, and Mortality of Black Bears in North-Central Florida	Wooding	1983	1988	1985.5	1994	Bears: Their Bio and Manage	9	1	349	356	Carnivora	Ursidae	Ursus	americanus	111000	27.9	Juvenile	30.2654	-82.4333	2	2	1	0	1	0
Survival of Radiocollared Adult Moose Lower Susitna River Valley AK	Modafferi	1980	1991	1985.5	1997	The Journal of Wildlife Management	61	2	540	549	Artiodactyla	Cervidae	Alces	alces	481000	64.2	Adult	61.8884	-149.946	42	42	42	31	0	0
Caribou Calf Mortality in Denali National Park, Alaska	Adams	1984	1987	1985.5	1995	The Journal of Wildlife Management	59	3	584	594	Artiodactyla	Cervidae	Rangifer	tarandus	108000	2400	Juvenile	63.3255	-150.632	112	104	0	0	0	102
Evidence of Tularemia Regulating a Semi-isolated Cottontail Rabbit Population	Woolf	1982	1990	1986	1993	The Journal of Wildlife Management	57	1	144	157	Lagomorpha	Leporidae	Sylvilagus	floridanus	1210	0.01	Adult	38.0936	-88.9502	91	54	20	0	0	22
Mountain goat recruitment: kid production and survival to breeding age	Festa-Bianchet	1989	1983	1986	1994	Canadian Journal of Zoology	72	1	22	27	Artiodactyla	Bovidae	Oreamnos	americanus	71300	15.7	Juvenile	54.0001	-119.593	16	15	0	0	0	14
Effects of Gypsy Moth Infestation on Black Bear Reproduction and Survival	Kasbohm	1982	1990	1986	1996	The Journal of Wildlife Management	60	2	408	416	Carnivora	Ursidae	Ursus	americanus	111000	27.9	Adult	38.2894	-78.6891	10	9	9	8	0	0
Effects of Gypsy Moth Infestation on Black Bear Reproduction and Survival	Kasbohm	1982	1990	1986	1996	The Journal of Wildlife Management	60	2	408	416	Carnivora	Ursidae	Ursus	americanus	111000	27.9	Juvenile	38.2894	-78.6891	4	4	4	3	1	0
Rates and Causes of Grizzly Bear Mortality in the Interior Mountains of Western North America	McLellan	1975	1997	1986	1999	Proc Conf Biol Manage Species and Habitats at Risk	2	0	673	678	Carnivora	Ursidae	Ursus	arctos	196000	282	Adult	47.6702	-113.427	47	45	35	15	1	0
Rates and Causes of Grizzly Bear Mortality in the Interior Mountains of Western North America	McLellan	1975	1997	1986	1999	Proc Conf Biol Manage Species and Habitats at Risk	2	0	673	678	Carnivora	Ursidae	Ursus	arctos	196000	282	Juvenile	47.6702	-113.427	45	42	38	8	1	0
Emigration and Mortality in orphaned male white-tailed deer	Holzenbein	1985	1988	1986.5	1992	The Journal of Wildlife Management	56	1	147	153	Artiodactyla	Cervidae	Odocoileus	virginianus	75000	1.84	Juvenile	38.8188	-78.4003	22	22	10	7	2	10
Mortality Causes and Survival Estimates for Adult columbian Black-Tailed Deer	McNay	1982	1991	1986.5	1995	The Journal of Wildlife Management	59	1	138	146	Artiodactyla	Cervidae	Odocoileus	hemionus	83800	1.99	Adult	49.0337	-124.196	54	48	9	9	0	33
Home Range, Movements and Habitat Utilization of Striped Skunk (Mephitis mephitis) in Scarborough, Ontario, Canada: Disease Management Implications	Rosatte	1986	1987	1986.5	2011	Canadian Field Naturalist	125	1	27	33	Carnivora	Mephitidae	Mephitis	mephitis	2400	2.01	Adult	43.7685	-79.2287	4	4	0	0	0	4
Population density, survival, and rabies in raccoons in an urban national park	Riley	1983	1990	1986.5	1998	Canadian Journal of Zoology	76	6	1153	1164	Carnivora	Procyonidae	Procyon	lotor	6370	4.13	Adult	38.9712	-77.0486	9	8	5	0	2	0
Population density, survival, and rabies in raccoons in an urban national park	Riley	1983	1990	1986.5	1998	Canadian Journal of Zoology	76	6	1153	1164	Carnivora	Procyonidae	Procyon	lotor	6370	4.13	Juvenile	38.9712	-77.0486	11	11	4	0	1	0
Productivity, Survival and Movements of Female Moose in a Low-Density Population, Northwest Territories, Canada	Stenhouse	1985	1988	1986.5	1995	Arctic	48	1	57	62	Artiodactyla	Cervidae	Alces	alces	481000	64.2	Adult	68.1706	-130.833	11	8	3	3	0	5
Factors limiting woodland caribou populations and the interrelationships with wolves and moose in southeastern British Columbia	Seip	1984	1989	1986.5	1992	Canadian Journal of Zoology	70	8	1494	1503	Artiodactyla	Cervidae	Rangifer	tarandus	108000	2400	Adult	52.617	-120.838	23	18	0	0	0	13
Factors limiting woodland caribou populations and the interrelationships with wolves and moose in southeastern British Columbia	Seip	1984	1989	1986.5	1992	Canadian Journal of Zoology	70	8	1494	1503	Artiodactyla	Cervidae	Rangifer	tarandus	108000	2400	Adult	52.4506	-120.057	6	4	0	0	0	4
Survival rates of radio-collared female polar bears and their dependent young	Amstrup	1981	1992	1986.5	1995	Canadian Journal of Zoology	73	7	1312	1322	Carnivora	Ursidae	Ursus	maritimus	375000	70200	Adult	70.0628	-147.121	21	21	18	17	0	0
Habitat Use and survival of Sonoran pronghorn in years with above-average rainfall	deVos	1983	1991	1987	2005	Wildlife Society Bulletin	33	1	35	42	Artiodactyla	Antilocapridae	Antilocapra	americana	46900	9.68	Adult	32.1293	-113.063	4	1	0	0	0	1
Dispersal of Juvenile Fishers in Maine	Arthur	1984	1990	1987	1993	The Journal of Wildlife Management	57	4	868	874	Carnivora	Mustelidae	Martes	pennanti	3750	15	Juvenile	44.457	-69.2344	19	18	18	18	0	0
Adult Raccoon survival in enzootic rabies area of Pennsylvania	Brown	1987	1988	1987.5	1990	Journal of Wildlife Diseases	26	3	346	350	Carnivora	Procyonidae	Procyon	lotor	6370	4.13	Adult	40.9829	-77.771	15	12	12	11	1	0
Population Dynamics of San Joaquin Kit Foxes at the Naval Petroleum Reserves in California	Cypher	1980	1995	1987.5	2000	Wildlife Monographs	145	1	1	43	Carnivora	Canidae	Vulpes	macrotis	2140	6.51	Adult	35.0109	-119.279	222	150	21	1	20	127
Population Dynamics of San Joaquin Kit Foxes at the Naval Petroleum Reserves in California	Cypher	1980	1995	1987.5	2000	Wildlife Monographs	145	1	1	43	Carnivora	Canidae	Vulpes	macrotis	2140	6.51	Juvenile	35.0109	-119.279	142	87	11	0	11	72
Diseases, Parasites and Survival of Coyotes in South-Central Georgia	Holzman	1987	1988	1987.5	1992	Journal of Wildlife Diseases	28	4	572	580	Carnivora	Canidae	Canis	latrans	12000	16.8	Adult	31.8693	-82.9153	3	1	1	0	0	0
Diseases, Parasites and Survival of Coyotes in South-Central Georgia	Holzman	1987	1988	1987.5	1992	Journal of Wildlife Diseases	28	4	572	580	Carnivora	Canidae	Canis	latrans	12000	16.8	Juvenile	31.8693	-82.9153	6	5	1	1	0	0
Adult Black Bear Reproduction, Survival and Mortality Sources in Northwestern Montana	Kasworm	1983	1992	1987.5	1994	Bears: Their Bio and Manage	9	1	223	230	Carnivora	Ursidae	Ursus	americanus	111000	27.9	Adult	48	-116	21	18	17	17	0	0
Ecology of a partially migratory elk population	Woods	1986	1989	1987.5	1991	Thesis: The University of British Columbia	0	0	1	149	Artiodactyla	Cervidae	Cervus	elaphus	240000	50.5	Adult	51.2859	-115.856	17	17	9	1	5	3
Mortality of Rocky Mountain Elk in Michigan due to Meningeal worm	Bender	1981	1994	1987.5	2005	Journal of Wildlife Diseases	41	1	134	140	Artiodactyla	Cervidae	Cervus	elaphus	240000	50.5	Adult	45.1501	-84.1987	67	63	56	56	0	0
Mortality of Rocky Mountain Elk in Michigan due to Meningeal worm	Bender	1981	1994	1987.5	2005	Journal of Wildlife Diseases	41	1	134	140	Artiodactyla	Cervidae	Cervus	elaphus	240000	50.5	Juvenile	45.1501	-84.1987	9	8	5	5	0	0
Population Dynamics of Selkirk Mountain Grizzly Bears	Wielgus	1985	1990	1987.5	1994	The Journal of Wildlife Management	58	2	266	272	Carnivora	Ursidae	Ursus	arctos	196000	282	Adult	49.2257	-115.539	4	4	3	3	0	0
Population Dynamics of Selkirk Mountain Grizzly Bears	Wielgus	1985	1990	1987.5	1995	The Journal of Wildlife Management	58	2	266	272	Carnivora	Ursidae	Ursus	arctos	196000	282	Juvenile	49.2257	-115.539	4	4	3	3	0	0
Population dynamics of the collared lemming and the tundra vole at Pearce Point, Northwest Territories, Canada	Krebs	1987	1989	1988	1995	Oceologia	103	4	481	489	Rodentia	Cricetidae	Dicrostonyx	groenlandicus	58.7	0.0066	Adult	69.7891	-122.655	135	135	6	0	0	129
Cause-specific mortality of white-tailed deer as influenced by military training activities in southwestern Oklahoma	Dinkines	1987	1989	1988	1992	Journal of Wildlife Diseases	28	3	391	399	Artiodactyla	Cervidae	Odocoileus	virginianus	75000	1.84	Adult	34.6758	-98.4716	22	21	17	5	3	3
Mortality Patterns of Female White-Tailed Deer in Southwest Florida	Land	1986	1990	1988	1993	Proc Ann Conf SEAFWA	47	0	176	184	Artiodactyla	Cervidae	Odocoileus	virginianus	75000	1.84	Adult	25.8531	-81.3959	28	26	6	6	0	16
Reproduction, preweaning survival and survival of adult sea otters at Kodiak Island, Alaska	Monson	1986	1990	1988	1995	Canadian Journal of Zoology	73	6	1161	1169	Carnivora	Mustelidae	Enhydra	lutris	27500	3.44	Adult	58.0076	-153.021	7	4	3	3	0	1
Characteristics of Dispersal in a Colonizing Wolf Population in the Central Rocky Mountains	Boyd	1979	1997	1988	1999	The Journal of Wildlife Management	63	4	1094	1108	Carnivora	Canidae	Canis	lupus	35000	21.8	Adult	48.7725	-113.822	31	30	25	17	0	0
Limiting factors might obscure population regulation of moose (Cervidae: Alces alces) in unproductive boreal forests	Crete	1987	1989	1988	1997	Journal of Zoology	242	4	765	781	Artiodactyla	Cervidae	Alces	alces	481000	64.2	Adult	50.4919	-66.0983	11	11	6	5	0	2
Demography of Grizzly Bears in Relation to Hunting and Mining Development in Northwestern Alaska	Ballard	1986	1990	1988	1993	Scientific Monograph US Dept of Interior	0	0	1	118	Carnivora	Ursidae	Ursus	arctos	196000	282	Adult	67.449	-163.519	16	16	14	14	0	0
Population Dynamics of a Recolonizing Wolf Population	Pletscher	1982	1995	1988.5	1997	The Journal of Wildlife Management	61	2	459	465	Carnivora	Canidae	Canis	lupus	35000	21.8	Adult	49.2887	-114.911	41	39	36	29	0	0
Estimating survival rates of black bears	Sorensen	1981	1996	1988.5	1998	Canadian Journal of Zoology	76	0	1335	1343	Carnivora	Ursidae	Ursus	americanus	111000	27.9	Adult	35.823	-82.3026	27	26	26	26	0	0
Elk Mortality in the Clearwater Drainage of Northcentral Idaho	Unsworth	1986	1991	1988.5	1993	The Journal of Wildlife Management	57	3	495	502	Artiodactyla	Cervidae	Cervus	elaphus	240000	50.5	Adult	46.5776	-115.346	69	66	60	60	0	0
Density Dependence, Compensation, and Environmental Effects on Elk Calf Mortality in Yellowstone National Park	Singer	1987	1990	1988.5	1997	The Journal of Wildlife Management	61	1	12	25	Artiodactyla	Cervidae	Cervus	elaphus	240000	50.5	Juvenile	44.7668	-109.808	65	56	4	4	0	29
Cyclic dynamics of snowshoe hares on a small island in the Yukon	Krebs	1977	2001	1989	2002	Canadian Journal of Zoology	80	8	1442	1450	Lagomorpha	Leporidae	Lepus	americanus	1570	0.03	Adult	61.2418	-138.402	88	74	0	0	0	74
Population Dynamics and Harvest Characteristics of Wolves in the Central Brooks Range, Alaska	Adams	1986	1992	1989	2008	Wildlife Monographs	170	1	1	25	Carnivora	Canidae	Canis	lupus	35000	21.8	Adult	68.0004	-153.003	20	20	9	9	0	0
Survival of Female Elk in Arizona	Ballard	1985	1993	1989	2000	The Journal of Wildlife Management	64	2	64	2	Artiodactyla	Cervidae	Cervus	elaphus	240000	50.5	Adult	33.8524	-109.7	37	29	27	25	2	2
Survival of Female Elk in Arizona	Ballard	1985	1993	1989	2000	The Journal of Wildlife Management	64	2	64	2	Artiodactyla	Cervidae	Cervus	elaphus	240000	50.5	Juvenile	33.8524	-109.7	4	3	2	2	0	1
Extent, Cause, and timing of Moose Calf Mortality in Western interior Alaska	Osborne	1988	1990	1989	1991	Alces	27	0	24	30	Artiodactyla	Cervidae	Alces	alces	481000	64.2	Juvenile	64.6861	-154.018	99	96	0	0	0	90
Brown Bear-Human Interactions Associated with Deer Hunting on Kodiak Island	Barnes	1988	1990	1989	1994	Bears: Their Bio and Manage	9	1	63	73	Carnivora	Ursidae	Ursus	arctos	196000	282	Adult	57.6356	-152.91	8	8	3	2	0	0
Brown Bear-Human Interactions Associated with Deer Hunting on Kodiak Island	Barnes	1988	1990	1989	1994	Bears: Their Bio and Manage	9	1	63	73	Carnivora	Ursidae	Ursus	arctos	196000	282	Adult	57.6356	-152.91	6	5	5	5	0	0
Demography of Decline of the Red Wine Mountains Caribou Herd	Schaefer	1981	1997	1989	1999	The Journal of Wildlife Management	63	2	580	587	Artiodactyla	Cervidae	Rangifer	tarandus	108000	2400	Adult	53.3515	-60.4448	30	30	3	3	0	27
Predation on Yellow-Bellied Marmots	Van Vuren	1984	1995	1989.5	2001	The American Midland Natrualist	145	1	94	100	Rodentia	Sciuridae	Marmota	flaviventris	3710	0.01	Adult	38.9575	-106.987	97	97	2	1	1	93
Dynamics of a snowshoe hare population in fragmented habitat	Keith	1988	1991	1989.5	1993	Canadian Journal of Zoology	71	7	1385	1392	Lagomorpha	Leporidae	Lepus	americanus	1570	0.03	Adult	44.3089	-90.1354	122	122	0	0	0	117
Early Survival of Juvenile Snowshoe Hares	O'Donoghue	1989	1990	1989.5	1994	Ecology	75	6	1582	1592	Lagomorpha	Leporidae	Lepus	americanus	1570	0.03	Juvenile	61.2359	-138.462	170	94	0	0	0	92
Wolf and bear predation on white-tailed deer fawns in northeastern Minnesota	Kunkel	1989	1990	1989.5	1994	Canadian Journal of Zoology	72	9	1557	1565	Artiodactyla	Cervidae	Odocoileus	virginianus	75000	1.84	Juvenile	47.9005	-91.8056	15	15	0	0	0	15
Mortality of San Joaquin Kit Fox at Camp Roberts Army National Guard Training Site, California	Standley	1988	1991	1989.5	1992	US Dept of Energy	0	0	1	30	Carnivora	Canidae	Vulpes	velox	2140	6.51	Adult	35.7901	-120.742	35	23	4	1	2	17
Mortality of San Joaquin Kit Fox at Camp Roberts Army National Guard Training Site, California	Standley	1988	1991	1989.5	1992	US Dept of Energy	0	0	1	30	Carnivora	Canidae	Vulpes	velox	2140	6.51	Juvenile	35.7901	-120.742	14	9	2	0	0	7
Ecology of Wolves in Relation to a Migratory Caribou Herd in Northwest Alaska	Ballard	1987	1992	1989.5	1997	Wildlife Monographs	135	1	3	47	Carnivora	Canidae	Canis	lupus	35000	21.8	Adult	67.2305	-160.057	53	53	36	36	0	1
The ecology and management of black bears in the Tensas River Basin of Louisiana	Weaver	1988	1991	1989.5	1999	Thesis: The University of Tennessee	0	0	1	327	Carnivora	Ursidae	Ursus	americanus	111000	27.9	Adult	32.1364	-91.3394	3	3	3	3	0	0
The ecology and management of black bears in the Tensas River Basin of Louisiana	Weaver	1988	1991	1989.5	1999	Thesis: The University of Tennessee	0	0	1	327	Carnivora	Ursidae	Ursus	americanus	111000	27.9	Juvenile	32.1364	-91.3394	2	2	2	2	0	0
Between-Habitat Movement of Dusky-Footed Woodrats and Vulnerability to Predation	Sakai	1990	1990	1990	1997	The Journal of Wildlife Management	61	2	343	350	Rodentia	Cricetidae	Neotoma	fuscipes	224	0.00159	Adult	41.2298	-123.509	3	3	0	0	0	3
Between-Habitat Movement of Dusky-Footed Woodrats and Vulnerability to Predation	Sakai	1990	1990	1990	1997	The Journal of Wildlife Management	61	2	343	350	Rodentia	Cricetidae	Neotoma	fuscipes	224	0.00159	Juvenile	41.2298	-123.509	6	6	0	0	0	6
Survival of rural and urban White-tailed Deer in Missouri	Hansen	1988	1992	1990	2003	Proc Ann Conf SEAFWA	57	0	326	336	Artiodactyla	Cervidae	Odocoileus	virginianus	75000	1.84	Adult	38.0967	-91.2212	74	67	61	60	1	0
Survival of rural and urban White-tailed Deer in Missouri	Hansen	1988	1992	1990	2003	Proc Ann Conf SEAFWA	57	0	326	336	Artiodactyla	Cervidae	Odocoileus	virginianus	75000	1.84	Adult	38.6206	-90.4817	100	88	88	13	73	0
Survival of rural and urban White-tailed Deer in Missouri	Hansen	1988	1992	1990	2003	Proc Ann Conf SEAFWA	57	0	326	336	Artiodactyla	Cervidae	Odocoileus	virginianus	75000	1.84	Adult	39.5221	-92.6578	112	101	98	87	11	0
Population ecology of white-tailed deer in Big Cypress National Preserve and Everglades National Park	Labisky	1989	1991	1990	1995	Final Report to USDI-National Park Service	0	0	1	38	Artiodactyla	Cervidae	Odocoileus	virginianus	75000	1.84	Adult	25.6993	-80.9705	36	26	18	18	0	8
Population ecology of white-tailed deer in Big Cypress National Preserve and Everglades National Park	Labisky	1989	1991	1990	1995	Final Report to USDI-National Park Service	0	0	1	38	Artiodactyla	Cervidae	Odocoileus	virginianus	75000	1.84	Juvenile	25.6993	-80.9705	58	38	3	3	0	33
Survivorship and cause-specific mortality in five populations of mule deer	Bleich	1986	1994	1990	1998	Great Basin Naturalist	58	3	265	272	Artiodactyla	Cervidae	Odocoileus	hemionus	83800	1.99	Adult	38.9644	-119.584	52	52	9	7	0	38
Spatial Relations in a Harvested Population of Marten in Maine	Katnik	1989	1991	1990	1994	The Journal of Wildlife Management	58	4	600	607	Carnivora	Mustelidae	Martes	americana	882	3.7	Adult	46.0086	-69.1173	21	21	18	18	0	0
Sources and Rates of San Joaquin Kit Fox Mortality in Western Kern County, CA	Disney	1989	1991	1990	1992	Transactions of the Western Section of the Wildlife Society	28	0	73	82	Carnivora	Canidae	Vulpes	macrotis	2140	6.51	Adult	35.3023	-119.476	33	22	1	0	1	21
Predation on San Joaquin Kit Foxes By Larger Canids	Ralls	1989	1991	1990	1995	Journal of Mammalogy	76	3	723	729	Carnivora	Canidae	Vulpes	macrotis	2140	6.51	Adult	35.0932	-119.744	22	19	1	0	1	17
Predation on San Joaquin Kit Foxes By Larger Canids	Ralls	1989	1991	1990	1995	Journal of Mammalogy	76	3	723	729	Carnivora	Canidae	Canis	latrans	12000	16.8	Adult	35.0932	-119.744	3	1	1	1	0	0
Demographic analysis of a hunted black bear population with access to a refuge	Powell	1981	1999	1990	1996	Conservation Biology	10	1	224	234	Carnivora	Ursidae	Ursus	americanus	111000	27.9	Adult	35.3554	-82.7013	25	24	23	23	0	0
Survival of Resident and Translocated Female Elk in the Cascade Mountains of Oregon	Stussy	1988	1992	1990	1994	Wildlife Society Bulletin	22	2	242	247	Artiodactyla	Cervidae	Cervus	elaphus	240000	50.5	Adult	44.9911	-121.866	54	38	37	37	0	0
Habitat selection, mortality and population monitoring of Shiras Moose in the North Fork of the Flathead River Valley, Montana	Langley	1989	1991	1990	1993	Thesis: University of Montana	0	0	1	162	Artiodactyla	Cervidae	Alces	alces	481000	64.2	Adult	48.9675	-114.018	4	4	0	0	0	3
Lynx Population Dynamics in an Untrapped Refugium	Slough	1986	1994	1990	1996	The Journal of Wildlife Management	60	4	946	961	Carnivora	Felidae	Lynx	lynx	19300	121	Adult	60.1328	-133.276	24	24	7	7	0	0
Movements, Survival and Mortality of Black-tailed Deer in the Klickitat Basin of Washington	McCorquodale	1988	1993	1990.5	1999	The Journal of Wildlife Management	63	3	861	871	Artiodactyla	Cervidae	Odocoileus	hemionus	83800	1.99	Adult	46.154	-121.112	37	34	23	23	0	0
The Ecology of red foxes, Vulpes vulpes, in Metropolitan Toronto, Ontario: Disease Management Implications	Rosatte	1989	1992	1990.5	2009	Canadian Field Naturalist	123	3	215	220	Carnivora	Canidae	Vulpes	vulpes	2140	3.11	Adult	43.7104	-79.3688	11	6	4	1	3	2
Habitat Use and Population Characteristics of Bighorn Sheep on Hart Mountain National Antelope Refuge, Oregon	Payer	1990	1991	1990.5	1992	Thesis: Oregon State University	0	0	1	105	Artiodactyla	Bovidae	Ovis	canadensis	74600	16.2	Adult	42.5385	-119.629	4	4	4	4	0	0
A Demographic Comparison of Two Black Bear Populations in the Interior Highlands of Arkansas	Clark	1989	1992	1990.5	1994	Wildlife Society Bulletin	22	4	593	603	Carnivora	Ursidae	Ursus	americanus	111000	27.9	Adult	35.6177	-94.0022	1	1	0	0	0	0
Limitation of collared lemming population growth at low densities by predation mortality	Reid	1990	1992	1991	1995	Oikos	73	3	387	398	Rodentia	Cricetidae	Dicrostonyx	groenlandicus	58.7	0.0066	Adult	69.7891	-122.655	86	86	0	0	0	79
Population limitation in Arctic ground squirrels: Effects of food and predation	Hubbs	1990	1992	1991	1997	Journal of Animal Ecology	66	4	527	541	Rodentia	Sciuridae	Spermophilus	parryii	747	0.02	Adult	61.1558	-138.698	45	42	0	0	0	42
Predation risk and the 10-year snowshoe hare cycle	Hik	1989	1993	1991	1994	Thesis: The University of British Columbia	0	0	1	140	Lagomorpha	Leporidae	Lepus	americanus	1570	0.03	Adult	61.1651	-138.858	101	99	0	0	0	0
Physiological correlates of neonatal mortality in an overpopulated herd of white-tailed deer	Sams	1990	1992	1991	1996	Journal of Mammalogy	77	1	179	190	Artiodactyla	Cervidae	Odocoileus	virginianus	75000	1.84	Juvenile	36.4866	-118.565	25	25	1	0	1	9
Fawning Habitat of Desert Mule Deer in the Belmont and Big Horn Mountains, Arizona	Fox	1991	1991	1991	1992	Thesis: University of Arizona	0	0	1	55	Artiodactyla	Cervidae	Odocoileus	hemionus	83800	1.99	Adult	32.7698	-112.513	5	4	0	0	0	4
Mule Deer Movements, Survival and Use of Contaminated Areas at Rocky Flats, Colorado	Symonds	1990	1992	1991	1992	Thesis: Colorado State University	0	0	1	67	Artiodactyla	Cervidae	Odocoileus	hemionus	83800	1.99	Adult	39.8913	-105.201	15	11	8	0	8	1
Mule Deer Movements, Survival and Use of Contaminated Areas at Rocky Flats, Colorado	Symonds	1990	1992	1991	1992	Thesis: Colorado State University	0	0	1	67	Artiodactyla	Cervidae	Odocoileus	hemionus	83800	1.99	Juvenile	39.8913	-105.201	10	10	6	0	5	3
Demography of a Collared Peccary Population in South Texas	Hellgren	1989	1993	1991	1995	The Journal of Wildlife Management	59	1	153	163	Artiodactyla	Tayassuidae	Pecari	tajacu	21300	16.8	Adult	28.3121	-99.3933	5	1	1	1	0	0
Juvenile Survival and Population Regulation of the Jackson Elk Herd	Smith	1990	1992	1991	1998	The Journal of Wildlife Management	62	3	1036	1045	Artiodactyla	Cervidae	Cervus	elaphus	240000	50.5	Juvenile	43.7907	-110.68	56	41	37	37	0	3
Dispersal of juvenile cougars in fragmented habitat	Beier	1989	1993	1991	1995	The Journal of Wildlife Management	59	2	228	237	Carnivora	Felidae	Puma	concolor	53900	118	Juvenile	33.5608	-117.407	7	7	4	1	3	0
The effects of predation and food on red squirrel survival during a snowshoe hare decline	Stuart-Smith	1991	1992	1991.5	1993	Thesis: University of Alberta	0	0	1	91	Rodentia	Sciuridae	Tamiasciurus	hudsonicus	200	0.00703	Adult	61.3323	-138.576	17	17	0	0	0	17
The effects of predation and food on red squirrel survival during a snowshoe hare decline	Stuart-Smith	1991	1992	1991.5	1993	Thesis: University of Alberta	0	0	1	91	Rodentia	Sciuridae	Tamiasciurus	hudsonicus	200	0.00703	Juvenile	61.3323	-138.576	16	13	0	0	0	13
Population Characteristics of Sympatric Mule and White-Tailed Deer on Rocky Mountain Arsenal, Colorado	Whittaker	1990	1993	1991.5	2001	The Journal of Wildlife Management	65	4	946	952	Artiodactyla	Cervidae	Odocoileus	virginianus	75000	1.84	Adult	39.8159	-104.883	1	1	1	0	1	0
Effect of coyote predation on early fawn survival in sympatric deer species	Whittaker	1991	1992	1991.5	1999	Wildlife Society Bulletin	27	2	265	262	Artiodactyla	Cervidae	Odocoileus	virginianus	75000	1.84	Juvenile	39.8159	-104.883	24	19	0	0	0	19
Survival Rates and Adult Accompaniment of White-Tailed Deer Fawns on Remington Farms	Wickham	1991	1992	1991.5	1993	Proc Ann Conf SEAFWA	47	0	222	230	Artiodactyla	Cervidae	Odocoileus	virginianus	75000	1.84	Juvenile	39.1884	-76.1721	3	3	1	0	1	0
Desert Mule Deer Survival in Southwest Texas	Lawrence	1990	1993	1991.5	2004	The Journal of Wildlife Management	68	3	561	569	Artiodactyla	Cervidae	Odocoileus	hemionus	83800	1.99	Adult	30.2727	-103.644	37	34	12	12	0	12
Population Characteristics of Sympatric Mule and White-Tailed Deer on Rocky Mountain Arsenal, Colorado	Whittaker	1990	1993	1991.5	2001	The Journal of Wildlife Management	65	4	946	952	Artiodactyla	Cervidae	Odocoileus	hemionus	83800	1.99	Adult	39.8159	-104.883	7	3	1	0	1	2
Desert Mule Deer Survival in Southwest Texas	Lawrence	1990	1993	1991.5	2004	The Journal of Wildlife Management	68	3	561	569	Artiodactyla	Cervidae	Odocoileus	hemionus	83800	1.99	Juvenile	30.2727	-103.644	27	24	2	2	0	11
Effect of coyote predation on early fawn survival in sympatric deer species	Whittaker	1991	1992	1991.5	1999	Wildlife Society Bulletin	27	2	265	262	Artiodactyla	Cervidae	Odocoileus	hemionus	83800	1.99	Juvenile	39.8159	-104.883	34	29	2	0	2	27
Population and Movement Characteristics of radio-collared striped skunks in North Dakota during an epizootic of rabies	Greenwood	1991	1992	1991.5	1997	Journal of Wildlife Diseases	33	2	226	241	Carnivora	Mephitidae	Mephitis	mephitis	2400	2.01	Adult	47.2202	-98.8325	39	35	2	1	1	9
Roosevelt Elk Habitat Use in the Oregon Coast Range	Pope	1991	1992	1991.5	1994	Thesis: Oregon State University	0	0	1	76	Artiodactyla	Cervidae	Cervus	elaphus	240000	50.5	Adult	43.0929	-122.889	5	4	4	4	0	0
Population ecology of moose in Algonquin Provincial Park, Ontario, Canada	Garner	1990	1993	1991.5	1994	Thesis: State University of New York	0	0	1	101	Artiodactyla	Cervidae	Alces	alces	481000	64.2	Adult	45.7783	-78.3063	4	4	3	1	2	0
Population ecology of moose in Algonquin Provincial Park, Ontario, Canada	Garner	1990	1993	1991.5	1994	Thesis: State University of New York	0	0	1	101	Artiodactyla	Cervidae	Alces	alces	481000	64.2	Juvenile	45.7783	-78.3063	19	18	0	0	0	7
Demography and Population Trend of Grizzly Bears in the Swan Mountains, Montana	Mace	1987	1996	1991.5	1998	Conservation Biology	12	5	1005	1016	Carnivora	Ursidae	Ursus	arctos	196000	282	Adult	47.825	-113.646	13	9	6	0	0	0
Demography and Population Trend of Grizzly Bears in the Swan Mountains, Montana	Mace	1987	1996	1991.5	1998	Conservation Biology	12	5	1005	1016	Carnivora	Ursidae	Ursus	arctos	196000	282	Juvenile	47.825	-113.646	17	16	9	1	0	0
Use of Population Viability Analysis to Evaluate Management Options for the Endangered Lower Keys Marsh Rabbit	Forys	1991	1993	1992	1999	The Journal of Wildlife Management	63	1	251	260	Lagomorpha	Leporidae	Sylvilagus	palustris	1360	0.02	Adult	24.6833	-81.3667	27	27	11	1	10	16
Interactive effects of sublethal nematodes and nutritional status on snowshoe hare vulnerability to predation	Murray	1991	1993	1992	1997	Journal of Animal Ecology	66	2	250	264	Lagomorpha	Leporidae	Lepus	americanus	1570	0.03	Juvenile	50.7042	-97.6751	318	318	0	0	0	302
Porcupine demography in central Massachusetts	Hale	1991	1993	1992	1996	Canadian Journal of Zoology	74	3	480	484	Rodentia	Erethizonidae	Erethizon	dorsatum	7420	0.1	Adult	42.4018	-72.3438	14	10	2	0	1	0
Distribution and population ecology of the fox squirrel in Florida	Wooding	1990	1994	1992	1997	Thesis: University of Florida	0	0	1	139	Rodentia	Sciuridae	Sciurus	niger	-999	0.2	Adult	29.9698	-82.7047	15	14	5	0	4	9
Effect of Hurricane Andrew on Survival and Movements of White-Tailed Deer in the Everglades	Labisky	1991	1993	1992	1999	The Journal of Wildlife Management	63	3	872	879	Artiodactyla	Cervidae	Odocoileus	virginianus	75000	1.84	Adult	25.6449	-80.9289	5	2	2	2	0	0
Survival of American Marten in an untrapped Forest Preserve in Maine	Hodgman	1990	1994	1992	1997	Martes: taxonomy, ecology, techniques and management	0	0	86	99	Carnivora	Mustelidae	Martes	americana	882	3.7	Adult	46.0587	-68.9317	12	12	0	0	0	6
Winter Home Range and Habitat Use by Sympatric Fishers and American Martens in Northern Wisconsin	Wright	1990	1994	1992	1999	Thesis: University of Wisconsin	0	0	1	74	Carnivora	Mustelidae	Martes	americana	882	3.7	Adult	45.5462	-88.5856	6	2	0	0	0	1
Survival of American Marten in an untrapped Forest Preserve in Maine	Hodgman	1990	1994	1992	1997	Martes: taxonomy, ecology, techniques and management	0	0	86	99	Carnivora	Mustelidae	Martes	americana	882	3.7	Juvenile	46.0587	-68.9317	3	3	0	0	0	2
Winter Home Range and Habitat Use by Sympatric Fishers and American Martens in Northern Wisconsin	Wright	1990	1994	1992	1999	Thesis: University of Wisconsin	0	0	1	74	Carnivora	Mustelidae	Martes	pennanti	3750	15	Adult	45.5462	-88.5856	5	3	1	1	0	2
Dispersal Patterns of Lynx in the Northwest Territories	Poole	1989	1995	1992	1997	The Journal of Wildlife Management	61	2	497	505	Carnivora	Felidae	Lynx	rufus	6390	28.4	Adult	61.5975	-116.005	27	15	7	7	0	1
Reproduction and pre-weaning juvenile survival in a cyclic population of snowshoe hares	Stefan	1989	1996	1992.5	1998	Thesis: University of British Columbia	0	0	1	104	Lagomorpha	Leporidae	Lepus	americanus	1570	0.03	Juvenile	61.3166	-138.498	273	250	4	0	0	219
Survival and Sources of Mortality in Ocelots	Haines	1983	2002	1992.5	2005	The Journal of Wildlife Management	69	1	255	263	Carnivora	Felidae	Leopardus	pardalis	11900	4.53	Adult	26.2743	-97.3642	28	22	11	0	10	1
The Influence of Mountain Lion Predation on Bighorn Sheep Translocations	Rominger	1992	1993	1992.5	2004	The Journal of Wildlife Management	68	4	993	999	Artiodactyla	Bovidae	Ovis	canadensis	74600	16.2	Adult	36.5863	-105.397	26	18	4	4	0	12
Population Characteristics and Winter Ecology of Black Bears in Coahuila, Mexico	Doan-Crider	1991	1994	1992.5	1996	The Journal of Wildlife Management	60	2	398	407	Carnivora	Ursidae	Ursus	americanus	111000	27.9	Adult	28.8331	-102.25	1	1	0	0	0	0
Age Structure, Survival and Mortality of Mountain Lions in Southeastern Arizona	Cunningham	1991	1994	1992.5	2001	The Southwestern Naturalist	46	1	76	80	Carnivora	Felidae	Puma	concolor	53900	118	Adult	33.4991	-110.313	14	14	10	2	0	0
Demographics and Population Trends of Grizzly Bears in the Cabinet-Yaak and Selkirk	Wakkinen	1983	2002	1992.5	2004	Ursus	15	1	65	75	Carnivora	Ursidae	Ursus	arctos	196000	282	Adult	48.5042	-116.726	39	38	33	9	0	0
Demographics and Population Trends of Grizzly Bears in the Cabinet-Yaak and Selkirk	Wakkinen	1983	2002	1992.5	2004	Ursus	15	1	65	75	Carnivora	Ursidae	Ursus	arctos	196000	282	Juvenile	48.5042	-116.726	24	24	10	2	0	0
Species-Specific Population Dynamics of Cervids in a Multipredator Ecosystem	Kunkel	1990	1996	1993	1999	The Journal of Wildlife Management	63	4	1082	1093	Artiodactyla	Cervidae	Odocoileus	virginianus	75000	1.84	Adult	48.012	-113.803	42	39	5	5	0	33
Mortality and survival of white-tailed deer fawns on a north Atlantic coastal island	Long	1991	1995	1993	1998	Wildlife Biology	4	0	237	247	Artiodactyla	Cervidae	Odocoileus	virginianus	75000	1.84	Juvenile	44.3961	-68.2764	17	16	3	0	3	10
Mortality of Maturing White-tailed Deer in Coastal South Carolina	Morgan	1993	1993	1993	1995	Proc Ann Conf SEAFWA	49	0	414	422	Artiodactyla	Cervidae	Odocoileus	virginianus	75000	1.84	Juvenile	32.4626	-81.1101	14	12	7	5	2	3
Survival and Cause-Specific Mortality of Adult Bobcats in Central Mississippi	Chamberlain	1989	1997	1993	1999	The Journal of Wildlife Management	63	2	613	620	Carnivora	Felidae	Lynx	rufus	6390	28.4	Adult	32.1799	-89.3414	47	31	26	22	4	1
Effects of Road Management on Movement and Survival of Roosevelt Elk	Cole	1991	1995	1993	1997	The Journal of Wildlife Management	61	4	115	1126	Artiodactyla	Cervidae	Cervus	elaphus	240000	50.5	Adult	43.0867	-123.091	11	6	6	6	0	0
Species-Specific Population Dynamics of Cervids in a Multipredator Ecosystem	Kunkel	1990	1996	1993	1999	The Journal of Wildlife Management	63	4	1082	1093	Artiodactyla	Cervidae	Cervus	elaphus	240000	50.5	Adult	48.012	-113.803	28	27	6	6	0	21
Species-Specific Population Dynamics of Cervids in a Multipredator Ecosystem	Kunkel	1990	1996	1993	1999	The Journal of Wildlife Management	63	4	1082	1093	Artiodactyla	Cervidae	Alces	alces	481000	64.2	Adult	48.012	-113.803	21	19	3	3	0	14
Population dynamics and management of brown bears on Kodiak Island, Alaska	Van Daele	1982	2004	1993	2007	Thesis: University of Idaho	0	0	1	81	Carnivora	Ursidae	Ursus	arctos	196000	282	Adult	57.4734	-153.451	61	61	39	34	0	0
Biology and Habitat Use of the Mazama pocket gopher in the Puget Sound area, Washington	Witmer	1992	1995	1993.5	1996	Northwestern Science	70	2	93	98	Rodentia	Geomyidae	Thomomys	mazama	93	9.09e-05	Adult	46.8305	-122.779	4	4	0	0	0	4
Short-term effects of logging on snowshoe hares in the boreal forest	Ferron	1991	1996	1993.5	1998	Canadian Journal of Forest Research	28	9	1335	1343	Lagomorpha	Leporidae	Lepus	americanus	1570	0.03	Adult	47.6834	-78.533	10	8	0	0	0	8
A comparison of a cyclic and non-cyclic population of snowshoe hares in Kluane, Yukon	Jardine	1993	1994	1993.5	1995	Thesis: University of British Columbia	0	0	1	85	Lagomorpha	Leporidae	Lepus	americanus	1570	0.03	Adult	61.2867	-138.679	25	15	0	0	0	15
Survival and cause-specific mortality of adult male white-tailed deer managed under the Quality Deer management program	Bowman	1990	1997	1993.5	2007	Proc Ann Conf SEAFWA	62	0	76	81	Artiodactyla	Cervidae	Odocoileus	virginianus	75000	1.84	Adult	32.957	-90.1557	167	162	139	138	1	0
Survival and mortality of adult male white-tailed deer in Mississippi	Coggin	1990	1997	1993.5	1990	Thesis: Mississippi State University	0	0	1	53	Artiodactyla	Cervidae	Odocoileus	virginianus	75000	1.84	Adult	34.5836	-90.4893	167	162	139	138	1	0
Winter Severity, Survival and Cause-Specific Mortality of Female White-Tailed Deer in North-Central Minnesota	DelGiudice	1991	1996	1993.5	2002	The Journal of Wildlife Management	66	3	698	717	Artiodactyla	Cervidae	Odocoileus	virginianus	75000	1.84	Adult	47.7846	-93.7141	92	86	32	28	4	47
The Wolves of Algonquin Park: A 12 year Ecological Study	Theberge	1988	1999	1993.5	2004	Department of Geography University of Waterloo	0	0	1	215	Carnivora	Canidae	Canis	lupus	35000	21.8	Adult	45.8313	-78.336	74	74	48	31	5	0
Demography and decline of the Mentasa caribou herd in Alaska	Jenkins	1990	1997	1993.5	2005	Canadian Journal of Zoology	83	9	1174	1188	Artiodactyla	Cervidae	Rangifer	tarandus	108000	2400	Adult	61.7102	-142.985	38	14	0	0	0	12
Demography and decline of the Mentasa caribou herd in Alaska	Jenkins	1990	1997	1993.5	2005	Canadian Journal of Zoology	83	9	1174	1188	Artiodactyla	Cervidae	Rangifer	tarandus	108000	2400	Juvenile	61.7102	-142.985	100	89	0	0	0	89
Natal dispersal of juvenile arctic ground squirrels in the boreal forest	Byrom	1993	1995	1994	1999	Canadian Journal of Zoology	77	7	1048	1059	Rodentia	Sciuridae	Spermophilus	parryii	747	0.02	Juvenile	61.2914	-138.437	54	54	0	0	0	52
Spatial Use Patterns, Seasonal Habitat Selection, and Interactions among Adult Gray Foxes in Mississippi	Chamberlain	1991	1997	1994	2000	The Journal of Wildlife Management	64	3	742	751	Carnivora	Canidae	Urocyon	cinereoargenteus	3830	1.64	Adult	32.1799	-89.3414	18	10	6	6	0	0
Survival and Cause-Specific Mortality of Adult Raccoons in Central Mississippi	Chamberlain	1991	1997	1994	1999	The Journal of Wildlife Management	63	2	880	888	Carnivora	Procyonidae	Procyon	lotor	6370	4.13	Adult	32.1799	-89.3414	35	22	16	16	0	0
Variation in peccary populations: landscape composition or competition by an invader?	Gabor	1993	1995	1994	2000	Ecology	81	9	2509	2524	Artiodactyla	Tayassuidae	Pecari	tajacu	21300	16.8	Adult	28.3162	-99.4097	6	5	5	5	0	0
The ecology of gray wolf (Canis lupus) habitat use, survival, and persistence in the central Rocky Mountains, Canada	Callaghan	1987	2001	1994	2002	Thesis: University of Guelph	0	0	1	211	Carnivora	Canidae	Canis	lupus	35000	21.8	Adult	51.4941	-115.904	24	23	17	12	3	0
Demography of Black Bears in Hunted and Unhunted Areas of the Boreal Forest of Ontario	Obbard	1989	1999	1994	2008	The Journal of Wildlife Management	72	4	869	880	Carnivora	Ursidae	Ursus	americanus	111000	27.9	Adult	47.1744	-83.3326	34	34	13	13	0	4
Population Dynamics of the endangered mountain ecotype of woodland caribou in British Columbia, Canada	Wittmer	1984	2004	1994	2005	Canadian Journal of Zoology	83	3	407	418	Artiodactyla	Cervidae	Rangifer	tarandus	108000	2400	Adult	53.6977	-121.881	163	163	4	2	2	67
Snowshoe hare demography and behavior during a cyclic population increase	Hodges	1993	1996	1994.5	1998	Thesis: University of British Columbia	0	0	1	230	Lagomorpha	Leporidae	Lepus	americanus	1570	0.03	Adult	61.2987	-138.495	141	117	0	0	0	115
Female Survival Rates in a Declining White-Tailed Deer Population	DePerno	1993	1996	1994.5	2000	Wildlife Society Bulletin	28	4	1030	1037	Artiodactyla	Cervidae	Odocoileus	virginianus	75000	1.84	Adult	43.8667	-104.116	62	62	14	14	0	0
Influence of flood waters on survival, reproduction and habitat use of white-tailed deer in the Florida Everglades	MacDonald-Beyers	1994	1995	1994.5	2005	Wetlands	25	3	659	666	Artiodactyla	Cervidae	Odocoileus	virginianus	75000	1.84	Adult	25.6993	-80.9705	25	14	1	1	0	6
Seasonal movements, habitat use patterns, and population dynamics of white-tailed deer in an agricultural region of northern lower Michigan	Sitar	1994	1995	1994.5	1996	Thesis: Michigan State University	0	0	1	130	Artiodactyla	Cervidae	Odocoileus	virginianus	75000	1.84	Adult	45.1942	-83.8539	11	10	6	4	1	4
Seasonal movements, habitat use patterns, and population dynamics of white-tailed deer in an agricultural region of northern lower Michigan	Sitar	1994	1995	1994.5	1996	Thesis: Michigan State University	0	0	1	130	Artiodactyla	Cervidae	Odocoileus	virginianus	75000	1.84	Juvenile	45.1942	-83.8539	34	30	20	17	3	8
Variance in survival of young mule deer in the Sierra Nevada, CA	Bleich	1993	1996	1994.5	2006	California Fish and Game	92	1	24	38	Artiodactyla	Cervidae	Odocoileus	hemionus	83800	1.99	Juvenile	37.4	-118.566	33	23	9	0	0	12
Population Characteristics, survival rates, and causes of mortality of striped skunks	Hansen	1994	1995	1994.5	2004	The Southwestern Naturalist	49	1	54	60	Carnivora	Mephitidae	Mephitis	mephitis	2400	2.01	Adult	34.0055	-101.758	26	18	14	9	1	2
The Swift Fox in Rangeland and Cropland in Western Kansas: Relative Abundance, Mortality, and Body Size	Matlack	1994	1995	1994.5	2000	The Southwestern Naturalist	45	2	221	225	Carnivora	Canidae	Vulpes	velox	2140	6.51	Adult	39.1163	-101.653	21	21	5	0	5	7
The effects of prey distribution and abundance on eastern coyote life history and predation on white-tailed deer	Patterson	1992	1997	1994.5	2000	Thesis: The University of Saskatchewan	0	0	1	204	Carnivora	Canidae	Canis	latrans	12000	16.8	Adult	45.798	-61.2046	32	31	29	26	3	0
The effects of roads and land use on home range use, behavior and mortality of eastern coyotes (Canis latrans var.) in northern New York	Kendrot	1994	1995	1994.5	1998	Thesis: State University of New York	0	0	1	83	Carnivora	Canidae	Canis	latrans	12000	16.8	Adult	44.8068	-73.5311	16	16	14	9	2	0
Status of Roosevelt Elk in British Columbia	Quayle	1991	1998	1994.5	2003	British Columbia Ministry of Water, Land and Air Protection Wildlife Bulletin no. B-106	0	0	1	31	Artiodactyla	Cervidae	Cervus	elaphus	240000	50.5	Adult	49.7865	-125.749	9	9	7	7	0	2
Status of Roosevelt Elk in British Columbia	Quayle	1991	1998	1994.5	2003	British Columbia Ministry of Water, Land and Air Protection Wildlife Bulletin no. B-107	0	0	1	31	Artiodactyla	Cervidae	Cervus	elaphus	240000	50.5	Juvenile	49.7865	-125.749	1	1	1	1	0	0
Morphology and Population Characteristics of Vancouver Island Cougars, Puma concolor vancouverensis	Wilson	1991	1998	1994.5	2004	Canadian Field Naturalist	118	2	159	163	Carnivora	Felidae	Puma	concolor	53900	118	Adult	49.2574	-124.404	10	7	5	2	0	0
Characteristics of two mountain lion populations in Texas,USA	Harveson	1992	1997	1994.5	2012	Wildlife Biology	18	1	58	66	Carnivora	Felidae	Puma	concolor	53900	118	Adult	29.4081	-103.917	16	16	16	1	0	0
Ecology of the Mountain Lion on the Big Bend Ranch State Park in Trans-Pecos Texas	Pittman	1992	1997	1994.5	1995	Proc Ann Conf SEAFWA	49	0	552	559	Carnivora	Felidae	Puma	concolor	53900	118	Adult	29.427	-103.951	3	3	3	3	0	0
Physiological responses by lagomorphs to resource limitations by habitat fragmentation: implications for condition-sensitive predation	Villafuerte	1995	1995	1995	1997	Canadian Journal of Zoology	75	1	148	151	Lagomorpha	Leporidae	Sylvilagus	transitionalis	815	0.00413	Adult	43.1715	-71.3432	9	9	0	0	0	9
Mortality of Adult White-Tailed Deer on Fort Chaffee, Arkansas	Humphreys	1995	1995	1995	2000	Journal of the Arkansas Academy of Science	54	0	64	67	Artiodactyla	Cervidae	Odocoileus	virginianus	75000	1.84	Adult	35.272	-94.2536	7	6	5	5	0	1
Fawn Survival on Davis Island, Mississippi, After an Early Summer Flood	Bowman	1995	1995	1995	1998	Proc Ann Conf SEAFWA	52	0	397	402	Artiodactyla	Cervidae	Odocoileus	virginianus	75000	1.84	Juvenile	32.1794	-91.0871	5	5	0	0	0	3
Population characteristics of the Lake Revelstoke Caribou	Flaa	1992	1998	1995	1999	Proc Conf Biol Manage Species and Habitats at Risk	2	0	639	642	Artiodactyla	Cervidae	Rangifer	tarandus	108000	2400	Adult	51	-118	31	25	0	0	0	9
Habitat Selection and demography of a nonmigratory woodland caribou population in Newfoundland	Mahoney	1994	1996	1995	2003	Canadian Journal of Zoology	81	2	321	334	Artiodactyla	Cervidae	Rangifer	tarandus	108000	2400	Adult	48.9236	-57.6264	7	7	0	0	0	0
Habitat Selection and demography of a nonmigratory woodland caribou population in Newfoundland	Mahoney	1994	1996	1995	2003	Canadian Journal of Zoology	81	2	321	334	Artiodactyla	Cervidae	Rangifer	tarandus	108000	2400	Juvenile	48.9236	-57.6264	15	9	1	1	0	5
Effects of predation on the population dynamics of lemmings and on loss of goose nests	Wilson	1994	1997	1995.5	1999	Thesis: The University of British Columbia	0	0	1	204	Rodentia	Cricetidae	Dicrostonyx	groenlandicus	58.7	0.0066	Adult	68.4392	-107.198	45	45	0	0	0	43
Survival of juvenile hares during a cyclic population increase	Gillis	1995	1996	1995.5	1998	Canadian Journal of Zoology	76	10	1949	1955	Lagomorpha	Leporidae	Lepus	americanus	1570	0.03	Juvenile	60.95	-138.201	44	40	1	1	0	37
Survival and Cause-Specific Mortality Rates of Adult White-Tailed Deer in New Brunswick	Whitlaw	1994	1997	1995.5	1998	The Journal of Wildlife Management	62	4	1333	1341	Artiodactyla	Cervidae	Odocoileus	virginianus	75000	1.84	Adult	46.0076	-67.0047	51	43	19	17	2	21
Behavioral responses of coyotes to wolf recolonization in northwestern MT	Arjo	1994	1997	1995.5	1999	Canadian Journal of Zoology	77	12	1919	1927	Carnivora	Canidae	Canis	latrans	12000	16.8	Adult	48.8779	-114.019	13	10	0	0	0	8
Reproduction, survival and denning ecology of black bears in Southwestern Virginia	Ryan	1995	1996	1995.5	1997	Thesis: Virginia Polytechnic Institute and State University	0	0	1	87	Carnivora	Ursidae	Ursus	americanus	111000	27.9	Adult	38.0167	-79.7074	3	3	3	1	2	0
Reproduction, survival and denning ecology of black bears in Southwestern Virginia	Ryan	1995	1996	1995.5	1997	Thesis: Virginia Polytechnic Institute and State University	0	0	1	87	Carnivora	Ursidae	Ursus	americanus	111000	27.9	Juvenile	38.0167	-79.7074	3	2	1	1	0	1
Survival and Harvest Vulnerability of Elk in the Cascade Range of Washington	McCorquodale	1992	1999	1995.5	2003	The Journal of Wildlife Management	67	2	248	257	Artiodactyla	Cervidae	Cervus	elaphus	240000	50.5	Adult	46.154	-121.112	26	26	19	19	0	2
Emigration and Survival of 2-year-old male elk in Northwestern Colorado	Petersburg	1995	1996	1995.5	2000	Wildlife Society Bulletin	28	3	708	716	Artiodactyla	Cervidae	Cervus	elaphus	240000	50.5	Adult	40.2852	-108.925	32	30	28	28	0	2
Survival and Harvest Vulnerability of Elk in the Cascade Range of Washington	McCorquodale	1992	1999	1995.5	2003	The Journal of Wildlife Management	67	2	248	257	Artiodactyla	Cervidae	Cervus	elaphus	240000	50.5	Juvenile	46.154	-121.112	13	13	13	13	0	0
The effects of landscape disturbance on the population dynamics and behavior of moose (Alces alces) in the Greater Pukaskwa Ecosystem, Ontario	Burrows	1995	1996	1995.5	2001	Thesis: Lakehead University	0	0	1	87	Artiodactyla	Cervidae	Alces	alces	481000	64.2	Adult	48.2464	-85.8873	9	8	1	1	0	5
Characteristics of two mountain lion populations in Texas,USA	Harveson	1994	1997	1995.5	2012	Wildlife Biology	18	1	58	66	Carnivora	Felidae	Puma	concolor	53900	118	Adult	28.2914	-99.1372	9	8	7	5	0	0
Dispersal of juvenile collared lemmings in a high-density population	Blackburn	1996	1996	1996	1998	Canadian Journal of Zoology	76	12	2255	2261	Rodentia	Cricetidae	Dicrostonyx	groenlandicus	58.7	0.0066	Juvenile	68.3499	-108.083	13	2	0	0	0	2
Long-distance Movements of Juvenile Mohave Ground Squirrels	Harris	1995	1997	1996	2005	The Southwestern Naturalist	50	2	188	196	Rodentia	Sciuridae	Spermophilus	mohavensis	213	0.01	Juvenile	36.0667	-117.8	10	10	0	0	0	9
Anti-predator benefits of group living in white-nosed coatis	Hass	1994	1998	1996	2002	Behavioral Ecology and Sociobiology	51	6	570	578	Carnivora	Procyonidae	Nasua	narica	4580	0.7	Adult	19.4916	-105.029	11	9	0	0	0	6
Age-Specific Causes of Mortality among White-Tailed Deer Support Mate-Competition Theory	Ditchkoff	1995	1997	1996	2001	The Journal of Wildlife Management	65	3	552	559	Artiodactyla	Cervidae	Odocoileus	virginianus	75000	1.84	Adult	34.8203	-95.9265	39	31	24	21	3	3
Survival and Movements of White-Tailed Deer in Suburban Chicago, Illinois	Etter	1994	1998	1996	2002	The Journal of Wildlife Management	66	2	500	510	Artiodactyla	Cervidae	Odocoileus	virginianus	75000	1.84	Adult	41.9177	-87.9823	22	22	21	7	13	0
Survival and Movements of White-Tailed Deer in Suburban Chicago, Illinois	Etter	1994	1998	1996	2002	The Journal of Wildlife Management	66	2	500	510	Artiodactyla	Cervidae	Odocoileus	virginianus	75000	1.84	Juvenile	41.9177	-87.9823	9	9	9	0	8	0
The effects of urbanization on raccoon population demographics, home range, and spatial distribution patterns	Hatten	1995	1997	1996	2000	Thesis: University of Missouri-Columbia	0	0	1	105	Carnivora	Procyonidae	Procyon	lotor	6370	4.13	Adult	42.4224	-88.3164	44	44	21	0	19	2
Demographic Factors Contributing to High Raccoon Densities in Urban Landscapes	Prange	1995	1997	1996	2003	The Journal of Wildlife Management	67	2	324	333	Carnivora	Procyonidae	Procyon	lotor	6370	4.13	Adult	42.4278	-88.3228	46	46	23	0	19	2
Mountain Sheep and Mining: Implications for conservation and management	Oehler	1995	1997	1996	2005	California Fish and Game	91	3	149	178	Artiodactyla	Bovidae	Ovis	canadensis	74600	16.2	Adult	36.2753	-117.148	9	3	0	0	0	2
Demographic Patterns and Limitation of Grey Wolves in and Near Pukaskwa National Park, Ontario	Forshner	1994	1998	1996	2000	Canadian Field Naturalist	118	1	95	104	Carnivora	Canidae	Canis	lupus	35000	21.8	Adult	48.352	-85.8108	17	16	8	5	0	0
Black bear monitoring in Eastern Interior Alaska	Bertram	1995	1997	1996	2002	Ursus	13	0	69	77	Carnivora	Ursidae	Ursus	americanus	111000	27.9	Adult	66.2428	-146.165	4	2	1	1	0	0
Cougar Survival and Source-Sink Structure on Greater Yellowstone's Northern Range	Ruth	1987	2005	1996	2011	The Journal of Wildlife Management	56	3	1381	1398	Carnivora	Felidae	Puma	concolor	53900	118	Adult	44.4296	-110.599	33	33	10	10	0	13
Seasonal distribution and population parameters of woodland caribou in central Manitoba: implications for forestry practices	Brown	1995	1997	1996	1998	Rangifer	12	0	85	94	Artiodactyla	Cervidae	Rangifer	tarandus	108000	2400	Adult	54.9099	-98.6276	1	1	0	0	0	1
Population Status and Mortality of Mountain Caribou in the Southern Purcell Mountains, British Columbia	Kinley	1994	1998	1996	2000	Proc Conf Biol Manage Species and Habitats at Risk	2	0	655	662	Artiodactyla	Cervidae	Rangifer	tarandus	108000	2400	Adult	49.1945	-116.445	15	12	2	1	1	9
Calf Mortality and Population Growth in the Delta Caribou Herd after Wolf Control	Valkenburg	1995	1997	1996	2004	Wildlife Society Bulletin	32	3	746	756	Artiodactyla	Cervidae	Rangifer	tarandus	108000	2400	Juvenile	63.8648	-148.137	105	101	0	0	0	101
An evaluation of summer raccoon hunting on raccoon ecology	Hodges	1996	1997	1996.5	1998	Thesis: Mississippi State University	0	0	1	153	Carnivora	Procyonidae	Procyon	lotor	6370	4.13	Adult	32.1919	-89.3026	13	5	2	2	0	1
An evaluation of summer raccoon hunting on raccoon ecology	Hodges	1996	1997	1996.5	1998	Thesis: Mississippi State University	0	0	1	153	Carnivora	Procyonidae	Procyon	lotor	6370	4.13	Adult	32.1919	-89.3026	22	17	14	14	0	0
Causes and Rates of Mortality of Swift Foxes in Western Kansas	Sovada	1996	1997	1996.5	1998	The Journal of Wildlife Management	62	4	1300	1306	Carnivora	Canidae	Vulpes	velox	2140	6.51	Adult	39.1175	-101.646	18	17	4	0	0	13
Causes and Rates of Mortality of Swift Foxes in Western Kansas	Sovada	1996	1997	1996.5	1998	The Journal of Wildlife Management	62	4	1300	1306	Carnivora	Canidae	Vulpes	velox	2140	6.51	Juvenile	39.1175	-101.646	14	12	5	0	4	7
Birth Synchrony and Survival of Pronghorn Fawns	Gregg	1996	1997	1996.5	2001	The Journal of Wildlife Management	65	1	19	24	Artiodactyla	Antilocapridae	Antilocapra	americana	46900	9.68	Juvenile	42.532	-119.635	87	79	0	0	0	75
Survival of Wisonsin's gray wolves from endangered to harvest, 1980-2013	Stenglein	1980	2013	1996.5	2014	Thesis: University of Wisconsin Madison	0	0	1	172	Carnivora	Canidae	Canis	lupus	35000	21.8	Adult	45.9742	-90.7042	189	189	109	62	0	0
Survival of Wisonsin's gray wolves from endangered to harvest, 1980-2013	Stenglein	1980	2013	1996.5	2014	Thesis: University of Wisconsin Madison	0	0	1	172	Carnivora	Canidae	Canis	lupus	35000	21.8	Juvenile	45.9742	-90.7042	37	37	23	18	0	0
Black bear, Ursus americanus, ecology on the Northeast Coast of Labrador	Chaulk	1996	1997	1996.5	2005	Canadian Field Naturalist	119	2	164	174	Carnivora	Ursidae	Ursus	americanus	111000	27.9	Adult	56.5377	-61.8898	4	4	3	0	0	0
Population ecology of black bears in the Starkey Wildlife Management Unit in Northeastern Oregon, 1993-2000	Akenson	1993	2000	1996.5	2013	Oregon Department of Fish and Wildlife, Wildlife Technical Report 002-2013	0	0	1	19	Carnivora	Ursidae	Ursus	americanus	111000	27.9	Adult	48.8205	-122.349	15	13	13	12	1	0
Survival, Cause-Specific Mortality, Sex, and Ages of American Black Bears in Washington State, USA	Koehler	1994	1999	1996.5	2005	Ursus	16	2	157	166	Carnivora	Ursidae	Ursus	americanus	111000	27.9	Adult	47.001	-123.015	11	11	11	11	0	0
Survival, Cause-Specific Mortality, Sex, and Ages of American Black Bears in Washington State, USA	Koehler	1994	1999	1996.5	2005	Ursus	16	2	157	166	Carnivora	Ursidae	Ursus	americanus	111000	27.9	Adult	47.9095	-119.904	16	16	14	14	0	0
Survival, Cause-Specific Mortality, Sex, and Ages of American Black Bears in Washington State, USA	Koehler	1994	1999	1996.5	2005	Ursus	16	2	157	166	Carnivora	Ursidae	Ursus	americanus	111000	27.9	Adult	46.9865	-120.996	31	30	15	15	0	15
Population ecology of black bears in the Starkey Wildlife Management Unit in Northeastern Oregon, 1993-2000	Akenson	1993	2000	1996.5	2013	Oregon Department of Fish and Wildlife, Wildlife Technical Report 002-2014	0	0	1	19	Carnivora	Ursidae	Ursus	americanus	111000	27.9	Juvenile	48.8205	-122.349	11	9	9	9	0	0
Aspects of Reproduction and Cub Survival in a Hunted Population of Virginia Black Bears	Echols	1994	1999	1996.5	2000	Thesis: Virginia Polytechnic Institute and State University	0	0	1	101	Carnivora	Ursidae	Ursus	americanus	111000	27.9	Juvenile	37.4295	-80.4343	8	6	1	1	0	1
Life-History Consequences of Maternal Condition in Alaskan Moose	Keech	1996	1997	1996.5	2000	The Journal of Wildlife Management	64	2	450	462	Artiodactyla	Cervidae	Alces	alces	481000	64.2	Adult	64.3	-147.75	7	7	1	0	0	5
Life-History Consequences of Maternal Condition in Alaskan Moose	Keech	1996	1997	1996.5	2000	The Journal of Wildlife Management	64	2	450	462	Artiodactyla	Cervidae	Alces	alces	481000	64.2	Juvenile	64.3	-147.75	37	31	0	0	0	28
Survival of Columbian White-Tailed Deer in Western Oregon	Ricca	1996	1998	1997	2002	The Journal of Wildlife Management	66	4	1255	1266	Artiodactyla	Cervidae	Odocoileus	virginianus	75000	1.84	Adult	43.4197	-122.746	30	19	10	3	5	1
Black Bear survival and demography in the Bow Valley of Banff National Park, Alberta	Hebblewhite	1994	2000	1997	2003	Biological Conservation	112	3	415	425	Carnivora	Ursidae	Ursus	americanus	111000	27.9	Adult	51.4703	-116.038	11	11	9	0	4	2
Population Ecology of Black Bears in the Okefenokee-Osceola Ecosystem	Dobey	1995	1999	1997	2002	Final Report, Southern Appalachian Field Lab, US Geological Survey	0	0	1	151	Carnivora	Ursidae	Ursus	americanus	111000	27.9	Adult	30.6951	-82.3744	17	17	14	12	1	0
Population Ecology of Black Bears in the Okefenokee-Osceola Ecosystem	Dobey	1995	1999	1997	2002	Final Report, Southern Appalachian Field Lab, US Geological Survey	0	0	1	151	Carnivora	Ursidae	Ursus	americanus	111000	27.9	Adult	30.3173	-82.4376	2	2	2	2	0	0
Population dynamics of Virginia's hunted black bear population	Klenzendorf	1994	2000	1997	2002	Thesis: Virginia Polytechnic Institute and State University	0	0	1	150	Carnivora	Ursidae	Ursus	americanus	111000	27.9	Adult	38.5526	-78.9843	24	23	21	21	0	0
Population dynamics of Virginia's hunted black bear population	Klenzendorf	1994	2000	1997	2002	Thesis: Virginia Polytechnic Institute and State University	0	0	1	150	Carnivora	Ursidae	Ursus	americanus	111000	27.9	Juvenile	38.5526	-78.9843	10	10	8	8	0	0
Lynx ecology in the Southern Canadian Rocky Mountains: Preliminary Results and Conservation Implications	Apps	1996	1998	1997	1999	Proc Conf Biol Manage Species and Habitats at Risk	2	0	713	720	Carnivora	Felidae	Lynx	lynx	19300	121	Juvenile	51.1357	-115.947	3	3	0	0	0	0
Demography of barren-ground grizzly bears	McLoughlin	1995	1999	1997	2003	Canadian Journal of Zoology	81	2	294	301	Carnivora	Ursidae	Ursus	arctos	196000	282	Adult	67.7403	-115.078	6	6	2	2	0	0
Long-Term Changes in Demography and Migration of Newfoundland Caribou	Mahoney	1994	2000	1997	2002	Journal of Mammalogy	83	4	957	963	Artiodactyla	Cervidae	Rangifer	tarandus	108000	2400	Adult	48.7855	-56.9798	24	10	6	6	0	4
Survival of Cottontail Rabbits in Mississippi and an Examination of Latitudinal Variation	Bond	1997	1998	1997.5	2001	The American Midland Natrualist	145	1	127	136	Lagomorpha	Leporidae	Sylvilagus	floridanus	1210	0.01	Adult	33.331	-88.5816	76	73	5	3	2	68
Survival and home ranges of opossums in northeastern Kansas	Gipson	1996	1999	1997.5	2001	The Southwestern Naturalist	46	2	178	182	Didelphimorphia	Didelphidae	Didelphis	virginiana	2470	0.49	Adult	39.1103	-96.8108	17	14	3	0	2	11
Survival and Cause-Specific Mortality Among Furbearers in a Protected Area	Kamler	1995	2000	1997.5	2004	The American Midland Natrualist	151	1	27	34	Didelphimorphia	Didelphidae	Didelphis	virginiana	2470	0.49	Adult	39.173	-96.7615	21	19	3	0	2	16
Ecology of American Badgers near their range limit in southeastern British Columbia	Newhouse	1996	1999	1997.5	2000	Columbia Basin Fish and Wildlife Compensation Program	0	0	1	21	Carnivora	Mustelidae	Taxidea	taxus	7840	3.45	Adult	50.5418	-115.666	5	3	1	0	1	1
Ecology of American Badgers near their range limit in southeastern British Columbia	Newhouse	1996	1999	1997.5	2000	Columbia Basin Fish and Wildlife Compensation Program	0	0	1	21	Carnivora	Mustelidae	Taxidea	taxus	7840	3.45	Juvenile	50.5418	-115.666	3	3	0	0	0	2
Survival and Cause-Specific Mortality Among Furbearers in a Protected Area	Kamler	1995	2000	1997.5	2004	The American Midland Natrualist	151	1	27	34	Carnivora	Procyonidae	Procyon	lotor	6370	4.13	Adult	39.173	-96.7615	10	6	2	0	1	4
San Joaquin Kit Fox Home Range, habitat use, and movements in urban Bakersfield	Frost	1997	1998	1997.5	2005	Thesis: Humboldt University	0	0	1	75	Carnivora	Canidae	Vulpes	macrotis	2140	6.51	Adult	35.328	-119.1	2	2	1	0	1	1
Survival and Cause-Specific Mortality Among Furbearers in a Protected Area	Kamler	1995	2000	1997.5	2004	The American Midland Natrualist	151	1	27	34	Carnivora	Canidae	Canis	latrans	12000	16.8	Adult	39.173	-96.7615	10	9	8	5	3	0
Movement patterns of Barren-Ground Wolves in the Central Canadian Arctic	Walton	1997	1998	1997.5	2001	Journal of Mammalogy	82	3	867	876	Carnivora	Canidae	Canis	lupus	35000	21.8	Adult	65.2204	-113.248	4	3	3	3	0	0
Survival and Cause-Specific Mortality Among Furbearers in a Protected Area	Kamler	1995	2000	1997.5	2004	The American Midland Natrualist	151	1	27	34	Carnivora	Felidae	Lynx	rufus	6390	28.4	Adult	39.173	-96.7615	6	6	5	3	2	1
Survival of Unexploited Bobcats in Southern Illinois	Nielsen	1995	2000	1997.5	2002	The Journal of Wildlife Management	66	3	833	838	Carnivora	Felidae	Lynx	rufus	6390	28.4	Adult	37.5872	-88.6493	19	16	15	0	12	0
Pathogens, Nutritional Deficiency, and Climate Influences on a Declining Moose Population	Murray	1995	2000	1997.5	2006	Wildlife Monographs	166	1	1	30	Artiodactyla	Cervidae	Alces	alces	481000	64.2	Adult	48.6402	-96.0517	52	37	4	2	2	1
Pathogens, Nutritional Deficiency, and Climate Influences on a Declining Moose Population	Murray	1995	2000	1997.5	2006	Wildlife Monographs	166	1	1	30	Artiodactyla	Cervidae	Alces	alces	481000	64.2	Juvenile	48.6402	-96.0517	24	20	1	0	1	4
Declines in Populations of Woodland Caribou	McLoughlin	1993	2002	1997.5	2003	The Journal of Wildlife Management	67	4	755	761	Artiodactyla	Cervidae	Rangifer	tarandus	108000	2400	Adult	54.5816	-110.388	104	72	9	9	0	58
Natality and calf mortality of the Northern Alaska Peninsula and Southern Alaska Peninsula caribou herds	Sellers	1996	1999	1997.5	2001	Rangifer	14	0	161	166	Artiodactyla	Cervidae	Rangifer	tarandus	108000	2400	Juvenile	55.572	-161.94	22	13	0	0	0	11
Natality and calf mortality of the Northern Alaska Peninsula and Southern Alaska Peninsula caribou herds	Sellers	1996	1999	1997.5	2001	Rangifer	14	0	161	166	Artiodactyla	Cervidae	Rangifer	tarandus	108000	2400	Juvenile	56.9325	-158.492	13	7	0	0	0	4
Timing and causes of mortality in the endangered Vancouver Island marmot	Bryant	1992	2004	1998	2005	Canadian Journal of Zoology	83	5	674	682	Rodentia	Sciuridae	Marmota	vancouverensis	5240	-999	Adult	49.5773	-126.172	29	27	0	0	0	24
Demographic and Behavioral Characteristics of North American Porcupines	Ilse	1997	1999	1998	2001	The American Midland Natrualist	146	2	329	338	Rodentia	Erethizonidae	Erethizon	dorsatum	7420	0.1	Adult	29.6176	-100.448	2	2	1	1	0	0
Demographic and Behavioral Characteristics of North American Porcupines	Ilse	1997	1999	1998	2001	The American Midland Natrualist	146	2	329	338	Rodentia	Erethizonidae	Erethizon	dorsatum	7420	0.1	Juvenile	29.6176	-100.448	5	2	0	0	0	0
Anti-predator benefits of group living in white-nosed coatis	Hass	1996	2000	1998	2002	Behavioral Ecology and Sociobiology	51	6	570	578	Carnivora	Procyonidae	Nasua	narica	4580	0.7	Adult	31.5841	-110.442	24	21	0	0	0	19
Survival and Cause-specific mortality of raccoons on a northern bobwhite management area	Henner	1997	1999	1998	2000	Proc Ann Conf SEAFWA	54	0	341	349	Carnivora	Procyonidae	Procyon	lotor	6370	4.13	Adult	33.3943	-88.4752	14	10	7	2	5	1
Swift Fox Survival and Production in Southeastern Wyoming	Olson	1996	2000	1998	2002	Journal of Mammalogy	83	1	199	206	Carnivora	Canidae	Vulpes	velox	2140	6.51	Adult	41.9305	-106.05	35	29	1	0	1	26
Ecology of Fishers in the Sub-Boreal Forests of North-Central British Columbia	Weir	1996	2000	1998	2008	Peace/Williston Fish and Wildlife Compensation Program Report No. 315	0	0	1	178	Carnivora	Mustelidae	Martes	pennanti	3750	15	Adult	56.0775	-124.284	3	2	0	0	0	0
Ecology of Fishers in the Sub-Boreal Forests of North-Central British Columbia	Weir	1996	2000	1998	2008	Peace/Williston Fish and Wildlife Compensation Program Report No. 316	0	0	1	178	Carnivora	Mustelidae	Martes	pennanti	3750	15	Juvenile	56.0775	-124.284	5	5	3	3	0	0
Effects of urbanization and fragmentation on bobcats and coyotes in urban southern California	Riley	1996	2000	1998	2003	Conservation Biology	17	2	566	576	Carnivora	Canidae	Canis	latrans	12000	16.8	Adult	34.1973	-118.763	27	22	16	1	7	6
Effects of urbanization and fragmentation on bobcats and coyotes in urban southern California	Riley	1996	2000	1998	2003	Conservation Biology	17	2	566	576	Carnivora	Felidae	Lynx	rufus	6390	28.4	Adult	34.1973	-118.763	14	9	5	0	5	4
Bobcat movements and survival near United States Highway 281 in southern Texas	Tuovilla	1997	1999	1998	1999	Thesis: Texas A & M University-Kingsville	0	0	1	67	Carnivora	Felidae	Lynx	rufus	6390	28.4	Adult	28.4273	-98.1337	5	5	5	3	2	0
Neonatal mortality of elk in Wyoming: enivornmental, population, and predator effects	Smith	1997	1999	1998	2006	US Dept of Interior, US Fish and Wildlife Service, Biological Technical Publication BTP-R6007-3007	0	0	1	32	Artiodactyla	Cervidae	Cervus	elaphus	240000	50.5	Juvenile	43.8164	-110.605	42	42	0	0	0	32
Reproduction and Survival of Yellowstone Bison	Fuller	1995	2001	1998	2007	The Journal of Wildlife Management	71	7	2365	2372	Artiodactyla	Bovidae	Bison	bison	620000	55.6	Adult	44.4804	-110.653	15	10	4	0	4	3
Social and demographic effects of anthropogenic mortality: a test of the compensatory mortality hypothesis in the red wolf	Sparkman	1990	2006	1998	2011	Plos One	6	6	0	0	Carnivora	Canidae	Canis	rufus	26700	55.6	Adult	35.7924	-75.8751	175	142	107	0	0	0
Reproduction and survival of brown bears in southwest Alaska, USA	Kovach	1993	2003	1998	2006	Ursus	17	1	16	29	Carnivora	Ursidae	Ursus	arctos	196000	282	Adult	60	-159	13	13	3	0	0	0
Characteristics of a High Density Population of Southern Fox Squirrels	Lee	1998	1999	1998.5	2008	The American Midland Natrualist	159	2	385	393	Rodentia	Sciuridae	Sciurus	carolinensis	546	0.0081	Adult	32.3221	-80.8233	13	12	4	0	4	8
Use of residual forest by snowshoe hare in a clear-cut boreal landscape	St-Laurent	1998	1999	1998.5	2008	The Northeastern Naturalist	15	4	497	514	Lagomorpha	Leporidae	Lepus	americanus	1570	0.03	Adult	48.9422	-72.0981	8	8	0	0	0	8
The demographic response of bank-dwelling beavers to flow regulation: a comparison on the Green and Yampa rivers	Breck	1997	2000	1998.5	2001	Canadian Journal of Zoology	79	11	1957	1964	Rodentia	Castoridae	Castor	canadensis	18100	0.05	Adult	40.7995	-108.914	2	2	0	0	0	2
Survival and Cause-Specific Mortality of Adult Fox Squirrels in Southwestern Georgia	Conner	1998	1999	1998.5	2001	The Journal of Wildlife Management	65	2	200	204	Rodentia	Sciuridae	Sciurus	niger	-999	0.2	Adult	31.2522	-84.3719	24	12	0	0	0	7
Field immobilization and use of radio collars on long-tailed weasels	Gehring	1998	1999	1998.5	2000	Wildlife Society Bulletin	28	3	579	585	Carnivora	Mustelidae	Mustela	frenata	191	0.21	Adult	40.2842	-87.0151	2	2	0	0	0	2
Cougar predation and population growth of sympatric mule deer and white-tailed deer	Robinson	1997	2000	1998.5	2002	Canadian Journal of Zoology	80	3	556	568	Artiodactyla	Cervidae	Odocoileus	virginianus	75000	1.84	Adult	49.1529	-117.137	13	11	10	6	4	0
Movement Behavior, Dispersal, and the Potential for Localized Management of Deer in a Suburban Environment	Porter	1997	2000	1998.5	2004	The Journal of Wildlife Management	68	2	247	326	Artiodactyla	Cervidae	Odocoileus	virginianus	75000	1.84	Adult	43.2188	-77.5874	25	22	20	5	11	2
Cougar predation and population growth of sympatric mule deer and white-tailed deer	Robinson	1997	2000	1998.5	2002	Canadian Journal of Zoology	80	3	556	568	Artiodactyla	Cervidae	Odocoileus	hemionus	83800	1.99	Adult	49.1529	-117.137	21	17	2	0	2	13
Competitive interactions between endangered kit foxes and nonnative red foxes	Clark	1998	1999	1998.5	2005	Western North American Naturalist	65	2	153	163	Carnivora	Canidae	Vulpes	vulpes	2140	3.11	Juvenile	35.1266	-118.722	11	9	0	0	0	9
Competitive interactions between endangered kit foxes and nonnative red foxes	Clark	1998	1999	1998.5	2005	Western North American Naturalist	65	2	153	163	Carnivora	Canidae	Vulpes	macrotis	2140	6.51	Adult	35.1266	-118.722	2	2	0	0	0	2
Competitive interactions between endangered kit foxes and nonnative red foxes	Clark	1998	1999	1998.5	2005	Western North American Naturalist	65	2	153	163	Carnivora	Canidae	Vulpes	macrotis	2140	6.51	Juvenile	35.1266	-118.722	2	2	0	0	0	2
Adult and Fawn Mortality of Sonoran Pronghorn	Bright	1995	2002	1998.5	2005	Wildlife Society Bulletin	33	1	43	50	Artiodactyla	Antilocapridae	Antilocapra	americana	46900	9.68	Adult	32.1495	-113.078	27	16	0	0	0	12
Coyote Habitat Use in a Tropical Deciduous Forest of Western Mexico	Hidalgo-Mihart	1996	2001	1998.5	2006	The Journal of Wildlife Management	70	1	216	211	Carnivora	Canidae	Canis	latrans	12000	16.8	Adult	19.5017	-105.049	4	4	3	0	0	1
Landscape Use and Movements of Wolves in Relation to Livestock in a Wildland-Agriculture Matrix	Chavez	1998	1999	1998.5	2006	The Journal of Wildlife Management	70	4	1079	1086	Carnivora	Canidae	Canis	lupus	35000	21.8	Adult	48.19	-95.59	9	9	7	4	0	0
Effects of wildfire on black bear demographics in central Arizona	Cunningham	1997	2000	1998.5	2004	Wildlife Society Bulletin	32	3	928	937	Carnivora	Ursidae	Ursus	americanus	111000	27.9	Adult	33.8942	-111.413	9	9	8	7	1	1
Comparing survival and cause-specific mortality between resident and transient bobcats	Blankenship	1993	2004	1998.5	2006	Wildlife Biology	12	3	297	303	Carnivora	Felidae	Lynx	rufus	6390	28.4	Adult	28.1164	-97.4742	7	7	5	2	3	0
Comparing survival and cause-specific mortality between resident and transient bobcats	Blankenship	1993	2004	1998.5	2006	Wildlife Biology	12	3	297	303	Carnivora	Felidae	Lynx	rufus	6390	28.4	Juvenile	28.1164	-97.4742	8	7	5	2	3	0
Population Dynamics of Moose and Predators in Game Management Unit 13	Testa	1997	2000	1998.5	2001	Alaska Dept of Fish and Game, Federal Aid in Wildlife Restoration research final performance report, grants W-24-3 through W-27-3, Study 1.49	0	0	1	43	Artiodactyla	Cervidae	Alces	alces	481000	64.2	Juvenile	63.2154	-150.377	35	31	0	0	0	25
Causes and consequences of individual variation in territory size in the American red squirrel	Steury	1998	2000	1999	2003	Oikos	101	1	147	156	Rodentia	Sciuridae	Tamiasciurus	hudsonicus	200	0.00703	Adult	46.5464	-115.153	23	18	0	0	0	18
A demographic analysis of a southern snowshoe hare population in a fragmented habitat: evaluating the refugium model	Wirsing	1998	2000	1999	2001	Canadian Journal of Zoology	80	1	169	177	Lagomorpha	Leporidae	Lepus	americanus	1570	0.03	Adult	46.5583	-115.186	75	73	2	0	2	70
Demographics of a Protected Population of Gray Foxes in South Carolina	Weston	1998	2000	1999	2003	Journal of Mammalogy	84	3	996	1005	Carnivora	Canidae	Urocyon	cinereoargenteus	3830	1.64	Adult	33.3259	-81.744	7	4	1	0	1	2
Ecology and Translocation-aided recovery of an endangered badger population	Kinley	1996	2002	1999	2008	The Journal of Wildlife Management	72	1	113	122	Carnivora	Mustelidae	Taxidea	taxus	7840	3.45	Adult	53.9938	-121.952	9	7	4	0	4	2
Ecology and Translocation-aided recovery of an endangered badger population	Kinley	1996	2002	1999	2008	The Journal of Wildlife Management	72	1	113	122	Carnivora	Mustelidae	Taxidea	taxus	7840	3.45	Juvenile	53.9938	-121.952	5	5	1	0	0	1
Jackson Hole Pronghorn Study	Sawyer	1998	2000	1999	2000	Final Report Prepared for Ultra Petroleum, Wyoming Game and Fish Department	0	0	1	40	Artiodactyla	Antilocapridae	Antilocapra	americana	46900	9.68	Adult	43.7217	-110.403	6	2	1	0	1	1
Impacts of breeder loss on social structure, reproduction, and population growth in a social canid	Borg	1986	2012	1999	2015	Journal of Animal Ecology	84	2	177	187	Carnivora	Canidae	Canis	lupus	35000	21.8	Adult	63.4756	-151.395	94	94	67	0	0	0
Population ecology of black bears in the Alleghany mountains of Virginia	Bridges	1994	2004	1999	2005	Thesis: Virginia Polytechnic Institute and State University	0	0	1	249	Carnivora	Ursidae	Ursus	americanus	111000	27.9	Adult	37.3635	-80.5059	98	95	89	86	1	2
Population ecology of black bears in the Alleghany mountains of Virginia	Bridges	1994	2004	1999	2005	Thesis: Virginia Polytechnic Institute and State University	0	0	1	249	Carnivora	Ursidae	Ursus	americanus	111000	27.9	Juvenile	37.3635	-80.5059	11	9	1	1	0	7
Moose Mortality in Eastern Interior Alaska	Bertram	1998	2000	1999	2002	The Journal of Wildlife Management	66	3	747	756	Artiodactyla	Cervidae	Alces	alces	481000	64.2	Adult	66.2836	-147.391	7	7	1	1	0	6
Moose Mortality in Eastern Interior Alaska	Bertram	1998	2000	1999	2002	The Journal of Wildlife Management	66	3	747	756	Artiodactyla	Cervidae	Alces	alces	481000	64.2	Juvenile	66.2836	-147.391	45	38	0	0	0	35
Population dynamics of snowshoe hares in relation to furbearer harvest	Etcheverry	1998	2001	1999.5	2005	The Journal of Wildlife Management	69	2	771	781	Lagomorpha	Leporidae	Lepus	americanus	1570	0.03	Adult	47.5987	-69.351	71	71	3	2	1	61
Seasonal Survival and Cause-Specific Mortality of Urban and Striped Skunks in the Absence of Rabies	Gehrt	1998	2001	1999.5	2005	Journal of Mammalogy	86	6	1164	1170	Carnivora	Mephitidae	Mephitis	mephitis	2400	2.01	Adult	42.0412	-88.0068	30	28	10	0	9	1
Survival of Adult Martens in Northern Wisconsin	McCann	1993	2006	1999.5	2010	The Journal of Wildlife Management	74	7	1502	1507	Carnivora	Mustelidae	Martes	americana	882	3.7	Adult	46.2856	-91.16	12	10	1	0	0	9
Effects of sterilization on territory fidelity and maintenance, pair bonds, and survival rates of free-ranging coyotes	Bromley	1999	2000	1999.5	2001	Canadian Journal of Zoology	79	3	386	392	Carnivora	Canidae	Canis	latrans	12000	16.8	Adult	41.413	-111.228	9	5	5	5	0	0
Coyote (Canis latrans) habitat use, movement, and mortality patterns in Grand Teton National Park and suburban-agricultural areas of Jackson Hole, Wyoming	McGee	1999	2000	1999.5	2002	Thesis: University of Wyoming	0	0	1	93	Carnivora	Canidae	Canis	latrans	12000	16.8	Adult	43.4734	-110.756	9	9	8	5	3	0
Effects of forest disturbance on density, space use, and mortality of woodland caribou	Courtois	1998	2001	1999.5	2007	Ecoscience	14	4	491	498	Artiodactyla	Cervidae	Rangifer	tarandus	108000	2400	Adult	49.52	-69.7983	23	19	7	7	0	7
Community dynamics among reintroduced elk, white-tailed deer, and coyote in southeastern Kentucky	Cox	1999	2001	2000	2003	Thesis: University of Kentucky	0	0	1	292	Artiodactyla	Cervidae	Odocoileus	virginianus	75000	1.84	Adult	36.9028	-84.3424	3	3	3	2	1	0
Key deer fawn response to urbanization: is sustainable development possible?	Peterson	1998	2002	2000	2004	Wildlife Society Bulletin	32	2	493	499	Artiodactyla	Cervidae	Odocoileus	virginianus	75000	1.84	Juvenile	24.7203	-81.3855	9	9	3	0	3	0
Community dynamics among reintroduced elk, white-tailed deer, and coyote in southeastern Kentucky	Cox	1999	2001	2000	2003	Thesis: University of Kentucky	0	0	1	292	Artiodactyla	Cervidae	Odocoileus	virginianus	75000	1.84	Juvenile	36.9028	-84.3424	1	1	1	1	0	0
Behavior and survival of white-tailed deer neonates in two suburban forest preserves	Piccolo	1999	2001	2000	2010	Canadian Journal of Zoology	88	5	487	495	Artiodactyla	Cervidae	Odocoileus	virginianus	75000	1.84	Juvenile	41.6705	-87.8772	27	27	1	0	1	25
Population Ecology of Columbian Black-Tailed Deer in Urban Vancouver	Bender	1999	2001	2000	2004	The Northwestern Naturalist	85	2	53	59	Artiodactyla	Cervidae	Odocoileus	hemionus	83800	1.99	Adult	45.6428	-122.632	4	4	4	1	2	0
Survival, Cause-Specific Mortality and Harvesting of Male Black-Tailed Deer in Washington	Bender	1999	2001	2000	2004	The Journal of Wildlife Management	68	4	870	878	Artiodactyla	Cervidae	Odocoileus	hemionus	83800	1.99	Adult	47.3202	-122.072	26	24	13	13	0	8
Survival, Cause-Specific Mortality and Harvesting of Male Black-Tailed Deer in Washington	Bender	1999	2001	2000	2004	The Journal of Wildlife Management	68	4	870	878	Artiodactyla	Cervidae	Odocoileus	hemionus	83800	1.99	Adult	46.9132	-122.887	28	27	23	23	0	2
Demographic Response of Mule Deer to Experimental Reduction of coyotes and mountain lions in Southeastern Idaho	Hurley	1998	2002	2000	2011	Wildlife Monographs	178	1	1	33	Artiodactyla	Cervidae	Odocoileus	hemionus	83800	1.99	Adult	42.427	-113.05	70	57	3	0	0	45
Population Ecology of Columbian Black-Tailed Deer in Urban Vancouver	Bender	1999	2001	2000	2004	The Northwestern Naturalist	85	2	53	59	Artiodactyla	Cervidae	Odocoileus	hemionus	83800	1.99	Juvenile	45.6428	-122.632	2	2	2	0	1	0
Demographic Response of Mule Deer to Experimental Reduction of coyotes and mountain lions in Southeastern Idaho	Hurley	1998	2002	2000	2011	Wildlife Monographs	178	1	1	33	Artiodactyla	Cervidae	Odocoileus	hemionus	83800	1.99	Juvenile	42.427	-113.05	220	200	11	0	0	146
Neonatal Mule Deer Fawn Survival in West-Central Colorado	Pojar	1999	2001	2000	2004	The Journal of Wildlife Management	68	3	550	560	Artiodactyla	Cervidae	Odocoileus	hemionus	83800	1.99	Juvenile	38.621	-108.442	101	91	0	0	0	44
Changes in kit fox-coyote-prey relationships in the Great Basin desert, Utah	Arjo	1999	2001	2000	2007	Western North American Naturalist	67	3	389	401	Carnivora	Canidae	Vulpes	macrotis	2140	6.51	Adult	40.1263	-113.419	7	6	0	0	0	6
Changes in kit fox-coyote-prey relationships in the Great Basin desert, Utah	Arjo	1999	2001	2000	2007	Western North American Naturalist	67	3	389	401	Carnivora	Canidae	Vulpes	macrotis	2140	6.51	Juvenile	40.1263	-113.419	3	2	0	0	0	2
Swift fox reintroductions on the Blackfeet Indian Reservation, Montana, USA	Ausband	1998	2002	2000	2013	Biological Conservation	136	3	423	430	Carnivora	Canidae	Vulpes	velox	2140	6.51	Adult	48.7682	-112.956	33	31	5	0	5	26
Dynamics of Pneumonia in a Bighorn Sheep Metapopulation	Cassirer	1997	2003	2000	2007	The Journal of Wildlife Management	71	4	1080	1088	Artiodactyla	Bovidae	Ovis	canadensis	74600	16.2	Adult	45.9087	-116.956	49	49	4	3	1	13
Niche overlap and resource partitioning between sympatric kit foxes and coyotes in the Great Basin Desert of Utah	Kozlowski	1999	2001	2000	2008	The American Midland Natrualist	160	1	191	208	Carnivora	Canidae	Canis	latrans	12000	16.8	Adult	40.0666	-113.425	10	8	4	4	0	1
Niche overlap and resource partitioning between sympatric kit foxes and coyotes in the Great Basin Desert of Utah	Kozlowski	1999	2001	2000	2008	The American Midland Natrualist	160	1	191	208	Carnivora	Canidae	Canis	latrans	12000	16.8	Adult	40.0666	-113.425	9	8	0	0	0	7
Survival, reproduction and movements of Moose in the Upper Peninsula of Michigan	Dodge	1999	2001	2000	2004	Alces	40	0	71	85	Artiodactyla	Cervidae	Alces	alces	481000	64.2	Adult	45.7458	-87.4424	17	17	1	0	1	0
Implications of Cougar Prey Selection and Demography on Population Dynamics of Elk in Northeast Oregon	Clark	1989	2011	2000	2014	Thesis: Oregon State University	0	0	1	297	Carnivora	Felidae	Puma	concolor	53900	118	Adult	45.1587	-117.743	28	25	20	19	0	0
Cougar Exploitation Levels in Utah: Implications for Demographic Structure, Population Recovery, and Metapopulation Dynamics	Stoner	1996	2004	2000	2006	The Journal of Wildlife Management	70	6	1588	1600	Carnivora	Felidae	Puma	concolor	53900	118	Adult	38.6689	-112.077	52	52	35	28	2	4
Reducing Mortality on the Fortymile Caribou Herd	Boertje	1997	2003	2000	2003	AK Dept of Fish and Game, Fed Aid in Fish and Wildlife restoration research performance, grant W-27-3, study 3.43	0	0	1	51	Artiodactyla	Cervidae	Rangifer	tarandus	108000	2400	Juvenile	64.4351	-140.619	208	208	0	0	0	197
Resource Selection and Predation of North American Red Squirrels in Deciduous Forest Fragments	Goheen	2000	2001	2000.5	2005	Journal of Mammalogy	86	1	22	28	Rodentia	Sciuridae	Tamiasciurus	hudsonicus	200	0.00703	Adult	40.2475	-86.8317	19	19	0	0	0	17
Mortality by moonlight: predation risk and the snowshoe hare	Griffin	2000	2001	2000.5	2005	Behavioral Ecology	16	5	938	944	Lagomorpha	Leporidae	Lepus	americanus	1570	0.03	Adult	47.192	-113.446	115	112	0	0	0	112
Characteristics of a ringtail population in Trans Pecos, Texas	Ackerson	2000	2001	2000.5	2006	Texas Journal of Science	58	2	169	184	Carnivora	Procyonidae	Bassariscus	astutus	1020	0.66	Adult	30.0408	-103.522	7	6	0	0	0	6
Ecology of sympatric mule deer and white-tailed deer in west-central Texas	Brunjes	2000	2001	2000.5	2004	Thesis: Texas Tech University	0	0	1	82	Artiodactyla	Cervidae	Odocoileus	virginianus	75000	1.84	Adult	31.0051	-101.798	22	10	5	4	1	1
Survival, Birth Characteristics, and Cause-Specific Mortality of White-Tailed Deer Neonates	Carstensen	2000	2001	2000.5	2009	The Journal of Wildlife Management	73	2	175	183	Artiodactyla	Cervidae	Odocoileus	virginianus	75000	1.84	Juvenile	47.3423	-94.4085	28	24	0	0	0	24
Ecology of white-tailed deer in South Dakota: Growth, Survival and Winter Nutrition	Schmitz	1999	2002	2000.5	2006	Thesis: South Dakota State University	0	0	1	169	Artiodactyla	Cervidae	Odocoileus	virginianus	75000	1.84	Juvenile	44.0057	-103.419	48	33	2	2	0	31
Survival Rates, Mortality Causes and Habitats of Pennsylvania of White-Tailed Deer Fawns	Vreeland	2000	2001	2000.5	2004	Wildlife Society Bulletin	32	2	542	553	Artiodactyla	Cervidae	Odocoileus	virginianus	75000	1.84	Juvenile	40.8036	-77.2603	106	104	41	13	16	18
Ecology of sympatric mule deer and white-tailed deer in west-central Texas	Brunjes	2000	2001	2000.5	2004	Thesis: Texas Tech University	0	0	1	82	Artiodactyla	Cervidae	Odocoileus	hemionus	83800	1.99	Adult	31.0051	-101.798	15	7	3	2	0	0
Ecology of Columbian Black-Tailed Deer Fawns in Western Oregon	Pamplin	2000	2001	2000.5	2003	Thesis: Oregon State University	0	0	1	75	Artiodactyla	Cervidae	Odocoileus	hemionus	83800	1.99	Juvenile	43.2197	-122.679	11	11	0	0	0	9
Density, Movements and survival of raccoons in Ontario, Canada	Rosatte	1994	2007	2000.5	2010	Journal of Mammalogy	91	1	122	135	Carnivora	Procyonidae	Procyon	lotor	6370	4.13	Adult	44.2512	-76.4512	18	9	6	0	3	3
Interference competition between coyotes and raccoons: a test of the mesopredator release hypothesis	Gehrt	2000	2001	2000.5	2007	Behavioral Ecology	18	1	204	214	Carnivora	Procyonidae	Procyon	lotor	6370	4.13	Adult	42.0735	-88.2644	11	9	6	0	5	0
Community dynamics among reintroduced elk, white-tailed deer, and coyote in southeastern Kentucky	Cox	1999	2002	2000.5	2003	Thesis: University of Kentucky	0	0	1	292	Carnivora	Canidae	Canis	latrans	12000	16.8	Adult	36.9028	-84.3424	4	3	3	2	1	0
Community dynamics among reintroduced elk, white-tailed deer, and coyote in southeastern Kentucky	Cox	1999	2002	2000.5	2003	Thesis: University of Kentucky	0	0	1	292	Carnivora	Canidae	Canis	latrans	12000	16.8	Juvenile	36.9028	-84.3424	1	1	1	0	0	0
Pack Size of Wolves on Caribou winter ranges in West central Alberta	Kuzyk	2000	2001	2000.5	2006	Canadian Field Naturalist	120	3	313	318	Carnivora	Canidae	Canis	lupus	35000	21.8	Adult	53.8062	-119.408	7	7	2	2	0	0
Yearling and Subadult Black Bear Survival in a Hunted Virginia Population	Lee	1999	2002	2000.5	2005	The Journal of Wildlife Management	69	4	1641	1651	Carnivora	Ursidae	Ursus	americanus	111000	27.9	Adult	37.4295	-80.4343	46	46	46	46	0	0
Cougar population dynamics and viability in the Pacific Northwest	Lambert	1998	2003	2000.5	2006	The Journal of Wildlife Management	70	1	246	254	Carnivora	Felidae	Puma	concolor	53900	118	Adult	49.0812	-117.526	24	24	22	22	0	0
Wolverine Ecology in Plateau and Foothill Landscapes	Lofroth	2000	2001	2000.5	2001	Year End Report, Forest Renewal Activity 712261	0	0	1	99	Carnivora	Mustelidae	Gulo	gulo	12800	344	Adult	55.9164	-124.198	5	4	4	4	0	0
Wolverine Ecology in Plateau and Foothill Landscapes	Lofroth	2000	2001	2000.5	2001	Year End Report, Forest Renewal Activity 712260	0	0	1	99	Carnivora	Mustelidae	Gulo	gulo	12800	344	Juvenile	55.9164	-124.198	4	3	3	3	0	0
Population monitoring and Status of the Nushagak Peninsula Caribou Herd, 1988-2012	Aderman	1988	2013	2000.5	2013	Togiak National Wildlife Refuge, Dillingham, Alaska	0	0	1	30	Artiodactyla	Cervidae	Rangifer	tarandus	108000	2400	Adult	58.8383	-159.334	88	40	28	28	0	10
Survival and Cause-Specific Mortality of Mature Male White-Tailed Deer	Webb	1998	2004	2001	2007	The Journal of Wildlife Management	71	2	555	558	Artiodactyla	Cervidae	Odocoileus	virginianus	75000	1.84	Adult	27.9076	-99.0895	21	18	17	16	0	0
Physiological and Ecological aspects of winter torpor in captive and free-ranging striped skunks	Hwang	1999	2003	2001	2005	Thesis: University of Saskatchewan	0	0	1	143	Carnivora	Mephitidae	Mephitis	mephitis	2400	2.01	Adult	51.2674	-102.47	36	31	10	0	0	5
Physiological and Ecological aspects of winter torpor in captive and free-ranging striped skunks	Hwang	1999	2003	2001	2005	Thesis: University of Saskatchewan	0	0	1	143	Carnivora	Mephitidae	Mephitis	mephitis	2400	2.01	Juvenile	51.2674	-102.47	25	20	3	0	0	4
Reproductive Ecology and Cub Survival of Florida Black Bears	Garrison	1999	2003	2001	2007	The Journal of Wildlife Management	71	3	720	727	Carnivora	Ursidae	Ursus	americanus	111000	27.9	Juvenile	29.2568	-81.7871	20	16	4	0	4	0
Human-caused mortality influences spatial population dynamics: Pumas in landscapes with varying mortality risks	Newby	2001	2001	2001	2013	Biological Conservation	159	1	230	239	Carnivora	Felidae	Puma	concolor	53900	118	Juvenile	45.2062	-110.296	57	57	47	47	0	0
Snowshoe hare nutrition in a conifer forest: Effects of winter food on energy use, activity and demography in a low-density population	Ellsworth	2001	2002	2001.5	2009	Thesis: University of Idaho	0	0	1	107	Lagomorpha	Leporidae	Lepus	americanus	1570	0.03	Adult	47.686	-116.613	64	64	0	0	0	60
Survival of White-Tailed Deer in an Intensively Farmed Region of Minnesota	Brinkman	2001	2002	2001.5	2004	Wildlife Society Bulletin	32	3	726	731	Artiodactyla	Cervidae	Odocoileus	virginianus	75000	1.84	Adult	43.5302	-93.6617	13	11	10	6	3	1
White-tailed deer population characteristics and landscape use patterns in southwestern Lower Michigan	Pusateri	2001	2002	2001.5	2003	Thesis: Michigan State University	0	0	1	151	Artiodactyla	Cervidae	Odocoileus	virginianus	75000	1.84	Adult	42.4652	-85.3264	43	43	35	22	12	1
Survival of White-Tailed Deer in an Intensively Farmed Region of Minnesota	Brinkman	2001	2002	2001.5	2004	Wildlife Society Bulletin	32	3	726	731	Artiodactyla	Cervidae	Odocoileus	virginianus	75000	1.84	Juvenile	43.5302	-93.6617	7	7	1	0	1	4
Effect of Population Demographics and Social Pressures on White-Tailed Deer Dispersal Ecology	Shaw	2001	2002	2001.5	2006	The Journal of Wildlife Management	70	5	1291	1301	Artiodactyla	Cervidae	Odocoileus	virginianus	75000	1.84	Juvenile	39.1907	-76.1567	9	9	8	8	0	0
Pronghorn productivity and fawn survival in central and southeastern Wyoming	Zimmer	2001	2002	2001.5	2004	Thesis: University of Wyoming	0	0	1	127	Artiodactyla	Antilocapridae	Antilocapra	americana	46900	9.68	Juvenile	41.2751	-105.021	145	122	4	0	3	111
Predator-Mediated Indirect Effects of Snowshoe Hares on Dall's Sheep in Alaska	Arthur	1999	2004	2001.5	2010	The Journal of Wildlife Management	74	8	1709	1721	Artiodactyla	Bovidae	Ovis	dalli	69600	10	Adult	64.0529	-147.412	18	17	0	0	0	17
Predator-Mediated Indirect Effects of Snowshoe Hares on Dall's Sheep in Alaska	Arthur	1999	2004	2001.5	2010	The Journal of Wildlife Management	74	8	1709	1721	Artiodactyla	Bovidae	Ovis	dalli	69600	10	Juvenile	64.0529	-147.412	80	80	0	0	0	74
Movement and resource selection of recolonizing bighorn sheep on western Montana	DeCesare	2001	2002	2001.5	2002	Thesis: University of Montata	0	0	1	80	Artiodactyla	Bovidae	Ovis	canadensis	74600	16.2	Adult	46.7274	-113.445	6	6	1	0	1	4
Habitat use and movements of desert bighorn sheep at Elephant Mountain Wildlife Management Area, Texas	Locke	2001	2002	2001.5	2003	Thesis: Sul Ross State University	0	0	1	121	Artiodactyla	Bovidae	Ovis	canadensis	74600	16.2	Adult	29.9439	-103.642	1	1	0	0	0	1
Cause specific mortality of desert bighorn sheep lambs in the FRA Cristobal Mountains, New Mexico USA	Parsons	2001	2002	2001.5	2007	Thesis: University of Montana	0	0	1	93	Artiodactyla	Bovidae	Ovis	canadensis	74600	16.2	Juvenile	33.3714	-107.095	11	11	0	0	0	9
Ecology of bobcats in a longleaf pine forest in southwestern Georgia	Cochrane	2000	2003	2001.5	2003	Thesis: University of Georgia	0	0	1	96	Carnivora	Felidae	Lynx	rufus	6390	28.4	Adult	31.2522	-84.3719	8	5	4	3	1	0
Ecology of bobcats on land managed for northern bobwhite in southwestern Georgia	Godbois	2001	2002	2001.5	2003	Thesis: University of Georgia	0	0	1	94	Carnivora	Felidae	Lynx	rufus	6390	28.4	Adult	31.249	-84.3763	5	5	4	3	1	0
Elk Ecology-Study IV: Factors Influencing Elk Calf Recruitment	Zager	1999	2004	2001.5	2005	ID Dept of Fish and Game Project W-160-R-32	0	0	1	32	Artiodactyla	Cervidae	Cervus	elaphus	240000	50.5	Juvenile	46.5568	-116.021	31	27	0	0	0	27
Elk Ecology-Study IV: Factors Influencing Elk Calf Recruitment	Zager	1999	2004	2001.5	2005	ID Dept of Fish and Game Project W-160-R-33	0	0	1	32	Artiodactyla	Cervidae	Cervus	elaphus	240000	50.5	Juvenile	46.3401	-115.149	75	72	0	0	0	67
Elk Ecology-Study IV: Factors Influencing Elk Calf Recruitment	Zager	1999	2004	2001.5	2005	ID Dept of Fish and Game Project W-160-R-34	0	0	1	32	Artiodactyla	Cervidae	Cervus	elaphus	240000	50.5	Juvenile	45.6856	-115.42	107	100	6	6	0	92
Spatio-temporal ecology and habitat selection of the critically endangered tropical hare in Oaxaca, Mexico	Farias	2001	2003	2002	2004	Thesis: University of Massachusetts Amherst	0	3	249	120	Lagomorpha	Leporidae	Lepus	flavigularis	3000	0.03	Adult	16.337	-94.5128	13	13	3	2	0	10
Spatio-temporal ecology and habitat selection of the critically endangered tropical hare in Oaxaca, Mexico	Farias	2001	2003	2002	2004	Thesis: University of Massachusetts Amherst	0	3	249	120	Lagomorpha	Leporidae	Lepus	flavigularis	3000	0.03	Juvenile	16.337	-94.5128	16	16	1	1	0	15
Dispersal and Survival of Juvenile Beavers in Southern Illinois	McNew	2001	2003	2002	2005	The American Midland Natrualist	154	1	217	228	Rodentia	Castoridae	Castor	canadensis	18100	0.05	Juvenile	37.3458	-89.3315	12	9	0	0	0	5
Factors influencing survival and reproduction of Virginia opossums at their northern distributional limit	Kanda	2000	2004	2002	2005	Thesis: University of Massachusetts Amherst	0	0	1	172	Didelphimorphia	Didelphidae	Didelphis	virginiana	2470	0.49	Adult	42.364	-72.4419	30	26	16	0	16	9
Cause-Specific Mortality and Survival of White-Tailed Deer Fawns in Southwestern Lower Michigan	Burroughs	2001	2003	2002	2006	The Journal of Wildlife Management	70	3	743	751	Artiodactyla	Cervidae	Odocoileus	virginianus	75000	1.84	Juvenile	42.2274	-85.5038	17	17	11	5	5	0
Predator-specific mortality of pronghorn on yellowstone's Northern range	Barnowe-Meyer	1999	2005	2002	2009	Western North American Naturalist	69	2	186	194	Artiodactyla	Antilocapridae	Antilocapra	americana	46900	9.68	Adult	44.75	-110.761	22	14	0	0	0	13
Survival and movement behaviour of resident and translocated wapiti: Implications of their management in west-central Alberta, Canada	Frair	2000	2004	2002	2005	Thesis: University of Alberta	0	0	1	195	Artiodactyla	Cervidae	Cervus	elaphus	240000	50.5	Adult	53.6405	-112.864	14	10	6	6	0	2
Survival of Adult Female Elk in Yellowstone Following Wolf Restoration	Evans	2000	2004	2002	2006	The Journal of Wildlife Management	70	5	1372	1378	Artiodactyla	Cervidae	Cervus	elaphus	240000	50.5	Adult	45.035	-110.739	33	27	11	11	0	14
A Test of the Compensatory Mortality Hypothesis in Mountain Lions: A Management Experiment in West-Central Montana	Robinson	1998	2006	2002	2014	The Journal of Wildlife Management	78	5	791	807	Carnivora	Felidae	Puma	concolor	53900	118	Adult	46.6905	-113.122	30	28	25	25	0	0
Prevalence of Human-Caused mortality in an unhunted cougar population and potential Impacts to Management	Thompson	1999	2005	2002	2014	Wildlife Society Bulletin	38	2	341	347	Carnivora	Felidae	Puma	concolor	53900	118	Adult	43.865	-103.703	10	10	8	3	2	0
A Test of the Compensatory Mortality Hypothesis in Mountain Lions: A Management Experiment in West-Central Montana	Robinson	1998	2006	2002	2014	The Journal of Wildlife Management	78	5	791	807	Carnivora	Felidae	Puma	concolor	53900	118	Juvenile	46.6905	-113.122	33	32	23	22	1	2
Survival, Mortality and Predators of Red Tree Voles (Arborimus longicaudus)	Swingle	2002	2003	2002.5	2010	Northwestern Science	84	3	255	265	Rodentia	Cricetidae	Arborimus	longicaudus	21.8	-999	Adult	43.3651	-123.047	28	28	0	0	0	25
Mountain beaver home ranges, habitat use, and population dynamics in Washington	Arjo	2002	2003	2002.5	2007	Canadian Journal of Zoology	85	3	328	337	Rodentia	Aplodontiidae	Aplodontia	rufa	806	0.0012	Adult	47.0446	-123.836	20	15	0	0	0	15
Predation as a probable mechanism relating winter weather to population dynamics in a North American porcupine population	Mabille	2000	2005	2002.5	2010	Population Ecology	52	4	537	546	Rodentia	Erethizonidae	Erethizon	dorsatum	7420	0.1	Adult	48.3555	-68.8062	46	46	2	0	2	28
Effects of Roads on Endangered San Joaquin Kit Foxes	Cypher	2001	2004	2002.5	2009	The Journal of Wildlife Management	73	6	885	893	Carnivora	Canidae	Vulpes	macrotis	2140	6.51	Adult	35.3804	-119.583	22	12	1	0	1	11
Does interference competition with wolves limit the distribution and abundance of coyotes?	Berger	2001	2004	2002.5	2007	Journal of Animal Ecology	76	6	1075	1085	Carnivora	Canidae	Canis	lupus	35000	21.8	Adult	44.2195	-110.121	19	17	9	0	0	6
Bobcat ecology in a longleaf pine ecosystem in southwestern Georgia	Doughty	2001	2004	2002.5	2004	Thesis: University of Georgia	0	0	1	132	Carnivora	Felidae	Lynx	rufus	6390	28.4	Adult	31.2523	-84.3759	14	9	8	4	4	1
Bobcat ecology in a longleaf pine ecosystem in southwestern Georgia	Doughty	2001	2004	2002.5	2006	Thesis: University of Georgia	0	0	1	132	Carnivora	Felidae	Lynx	rufus	6390	28.4	Juvenile	31.2523	-84.3759	1	1	1	0	1	0
Dispersal Characteristics of Juvenile Bobcats in South-Central Indiana	Johnson	1999	2006	2002.5	2010	The Journal of Wildlife Management	74	3	379	385	Carnivora	Felidae	Lynx	rufus	6390	28.4	Juvenile	38.8683	-86.7979	3	3	3	0	3	0
Relations between nutritional condition and survival of North American elk	Bender	2002	2003	2002.5	2008	Wildlife Biology	14	1	70	80	Artiodactyla	Cervidae	Cervus	elaphus	240000	50.5	Adult	48.4694	-121.368	17	17	8	8	0	3
Calf Survival of Woodland Caribou in a Multi-Predator Ecosystem	Gustine	2002	2003	2002.5	2006	Wildlife Monographs	165	1	1	32	Artiodactyla	Cervidae	Rangifer	tarandus	108000	2400	Juvenile	57.1833	-121.85	18	18	0	0	0	17
Transition to independence by subadult beavers (Castor canadensis) in a unexploited, exponentially growing population	DeStefano	2001	2005	2003	2006	Journal of Zoology	269	4	434	441	Rodentia	Castoridae	Castor	canadensis	18100	0.05	Adult	42.3064	-72.5694	6	6	2	2	0	1
Transition to independence by subadult beavers (Castor canadensis) in a unexploited, exponentially growing population	DeStefano	2001	2005	2003	2006	Journal of Zoology	269	4	434	441	Rodentia	Castoridae	Castor	canadensis	18100	0.05	Juvenile	42.3064	-72.5694	3	3	2	0	0	1
Survival of White-Tailed Deer Neonates in Minnesota and South Dakota	Grovenburg	2002	2004	2003	2011	The Journal of Wildlife Management	75	1	213	220	Artiodactyla	Cervidae	Odocoileus	virginianus	75000	1.84	Juvenile	44.3901	-96.2134	15	15	0	0	0	12
Survival of White-Tailed Deer Fawns in Southern Illinois	Rohm	2002	2004	2003	2007	The Journal of Wildlife Management	71	3	851	860	Artiodactyla	Cervidae	Odocoileus	virginianus	75000	1.84	Juvenile	37.4855	-88.7229	64	49	3	0	1	41
Does the use of vaginal-implant transmitters affect neonate survival rate of white-tailed deer	Swanson	2003	2003	2003	2008	Wildlife Biology	14	2	272	279	Artiodactyla	Cervidae	Odocoileus	virginianus	75000	1.84	Juvenile	43.9637	-95.4263	7	7	0	0	0	7
Conservation Implications of winter-feeding policies for mule deer in Utah	Peterson	2001	2005	2003	2008	Thesis: Utah State University	0	0	1	190	Artiodactyla	Cervidae	Odocoileus	hemionus	83800	1.99	Adult	41.8807	-111.661	25	21	10	0	10	1
To twin or not to twin? Trade-offs in litter size and fawn survival in mule deer	Johnstone-Yellin	2003	2003	2003	2009	Journal of Mammalogy	90	2	453	460	Artiodactyla	Cervidae	Odocoileus	hemionus	83800	1.99	Juvenile	47.0111	-118.045	14	10	1	0	1	8
Population Dynamics of mule deer in the eastern Sierra Nevada: Implications of nutritional condition	Monteith	1997	2009	2003	2010	California Department of Fish and Game, Bishop California USA	0	0	1	51	Artiodactyla	Cervidae	Odocoileus	hemionus	83800	1.99	Juvenile	37.3321	-118.373	58	58	0	0	0	41
Human-caused mortality and population trends of American marten and fisher in a U.S. National Park	Belant	2001	2005	2003	2007	Natural Areas Journal	27	2	155	160	Carnivora	Mustelidae	Martes	americana	882	3.7	Adult	46.5786	-86.2986	7	7	5	4	1	1
Effects of Artificial Escape Dens on Swift Fox Populations in Northwest Texas	McGee	2002	2004	2003	2006	Wildlife Society Bulletin	34	3	821	827	Carnivora	Canidae	Vulpes	velox	2140	6.51	Adult	36.2813	-102.314	11	8	0	0	0	7
Recolonizing Wolves and mesopredator suppression of coyotes: impacts on pronghorn population dynamics	Berger	2002	2004	2003	2008	Ecological Applications	18	3	599	612	Artiodactyla	Antilocapridae	Antilocapra	americana	46900	9.68	Juvenile	43.7493	-110.687	96	77	0	0	0	72
Factors influencing a declining pronghorn population in Wind Cave National Park, South Dakota	Sievers	2002	2004	2003	2004	Thesis: South Dakota State University	0	0	1	92	Artiodactyla	Antilocapridae	Antilocapra	americana	46900	9.68	Juvenile	46.653	-103.429	13	13	0	0	0	12
Survival and Cause-specific Mortality of a Protected Population of River Otters in Minnesota	Gorman	2002	2004	2003	2008	The American Midland Natrualist	159	1	98	109	Carnivora	Mustelidae	Lontra	canadensis	8090	14.2	Adult	43.9533	-91.5294	5	5	4	0	1	0
Survival and Cause-specific Mortality of a Protected Population of River Otters in Minnesota	Gorman	2002	2004	2003	2008	The American Midland Natrualist	159	1	98	109	Carnivora	Mustelidae	Lontra	canadensis	8090	14.2	Juvenile	43.9533	-91.5294	4	3	3	0	0	0
Human-caused mortality and population trends of American marten and fisher in a U.S. National Park	Belant	2001	2005	2003	2007	Natural Areas Journal	27	2	155	160	Carnivora	Mustelidae	Martes	pennanti	3750	15	Adult	46.5786	-86.2986	1	1	1	1	0	0
Demographic Consequences of anthropogenic influences: Florida black bears in north-central Florida	Hostetler	1999	2007	2003	2009	Biological Conservation	142	11	2456	2463	Carnivora	Ursidae	Ursus	americanus	111000	27.9	Adult	29.2453	-81.7931	9	9	7	3	4	0
Demographic Consequences of anthropogenic influences: Florida black bears in north-central Florida	Hostetler	1999	2007	2003	2009	Biological Conservation	142	11	2456	2463	Carnivora	Ursidae	Ursus	americanus	111000	27.9	Juvenile	29.2453	-81.7931	21	15	2	0	2	0
Impact of calf survival on elk population dynamics in west-central Montana	Raithel	2002	2004	2003	2005	Thesis: University of Montana	0	0	1	106	Artiodactyla	Cervidae	Cervus	elaphus	240000	50.5	Adult	47.0079	-113.533	5	5	5	4	0	0
Impact of calf survival on elk population dynamics in west-central Montana	Raithel	2002	2004	2003	2005	Thesis: University of Montana	0	0	1	106	Artiodactyla	Cervidae	Cervus	elaphus	240000	50.5	Juvenile	47.0079	-113.533	28	28	2	1	0	18
Sex and scale: implications for habitat selection by Alaskan moose	Oehlers	2002	2004	2003	2011	Wildlife Biology	17	1	67	84	Artiodactyla	Cervidae	Alces	alces	481000	64.2	Adult	56.7469	-132.996	1	1	1	1	0	0
Hide or die: use of cover decreases predation risk in juvenile North American porcupines	Mabille	2003	2004	2003.5	2014	Journal of Mammalogy	95	5	992	1003	Rodentia	Erethizonidae	Erethizon	dorsatum	7420	0.1	Juvenile	48.3555	-68.8062	10	9	0	0	0	9
Ecology of white-tailed deer and bobcats on Kiawah Island, South Carolina: Implication for Suburban habitat preservation	Roberts	2002	2005	2003.5	2007	Thesis: University of Georgia	0	0	1	215	Artiodactyla	Cervidae	Odocoileus	virginianus	75000	1.84	Adult	32.6217	-80.0632	13	12	11	0	10	1
White-tailed deer antler point restrictions, harvest and survival rates, and deer hunter support: Perception versus reality	Wallingford	2002	2005	2003.5	2012	Thesis: Pennsylvania State University	0	0	1	138	Artiodactyla	Cervidae	Odocoileus	virginianus	75000	1.84	Adult	40.8485	-79.4118	74	73	72	62	9	0
White-tailed deer antler point restrictions, harvest and survival rates, and deer hunter support: Perception versus reality	Wallingford	2002	2005	2003.5	2012	Thesis: Pennsylvania State University	0	0	1	138	Artiodactyla	Cervidae	Odocoileus	virginianus	75000	1.84	Adult	40.9446	-77.993	50	49	46	42	4	1
Ecology of white-tailed deer and bobcats on Kiawah Island, South Carolina: Implication for Suburban habitat preservation	Roberts	2002	2005	2003.5	2007	Thesis: University of Georgia	0	0	1	215	Artiodactyla	Cervidae	Odocoileus	virginianus	75000	1.84	Juvenile	32.6217	-80.0632	105	101	10	0	10	79
White-tailed deer antler point restrictions, harvest and survival rates, and deer hunter support: Perception versus reality	Wallingford	2002	2005	2003.5	2012	Thesis: Pennsylvania State University	0	0	1	138	Artiodactyla	Cervidae	Odocoileus	virginianus	75000	1.84	Juvenile	40.8485	-79.4118	109	105	99	76	19	0
White-tailed deer antler point restrictions, harvest and survival rates, and deer hunter support: Perception versus reality	Wallingford	2002	2005	2003.5	2012	Thesis: Pennsylvania State University	0	0	1	138	Artiodactyla	Cervidae	Odocoileus	virginianus	75000	1.84	Juvenile	40.9446	-77.993	73	65	49	39	10	1
Survival and body condition of raccoons at the edge of the range	Pitt	2002	2005	2003.5	2008	The Journal of Wildlife Management	72	2	389	395	Carnivora	Procyonidae	Procyon	lotor	6370	4.13	Adult	50.2668	-99.7643	43	35	18	4	0	0
Effects of Habitat on Competition Between Kit Foxes and Coyotes	Nelson	2003	2004	2003.5	2007	The Journal of Wildlife Management	71	5	1467	1475	Carnivora	Canidae	Vulpes	macrotis	2140	6.51	Adult	35.4257	-119.637	25	20	1	0	1	19
Responses of Desert Bighorn Sheep to Removal of Water Sources	Cain	2002	2005	2003.5	2008	Wildlife Monographs	171	1	1	32	Artiodactyla	Bovidae	Ovis	canadensis	74600	16.2	Adult	32.1916	-113.331	17	8	0	0	0	3
Escaping the extinction vortex: Identifying factors affecting population performance and recovery in endangered Sierra Nevada bighorn sheep	Johnson	2001	2006	2003.5	2010	Thesis: University of Montana	0	0	1	229	Artiodactyla	Bovidae	Ovis	canadensis	74600	16.2	Adult	36.5297	-118.195	58	35	1	0	1	23
Effects of Sarcoptic Mange on Coyotes at Wind Cave National Park	Chronert	2003	2004	2003.5	2007	The Journal of Wildlife Management	71	6	1987	1992	Carnivora	Canidae	Canis	latrans	12000	16.8	Adult	43.6035	-103.426	11	10	4	3	1	0
Effects of Habitat on Competition Between Kit Foxes and Coyotes	Nelson	2003	2004	2003.5	2007	The Journal of Wildlife Management	71	5	1467	1475	Carnivora	Canidae	Canis	latrans	12000	16.8	Adult	35.4257	-119.637	2	2	2	1	1	0
Effects of control on the dynamics of an adjacent protected wolf population in interior Alaska	Schmidt	1993	2014	2003.5	2017	The Journal of Wildlife Management	198	1	1	30	Carnivora	Canidae	Canis	lupus	35000	21.8	Adult	64.8863	-142.939	104	83	35	22	0	0
Ecology of white-tailed deer and bobcats on Kiawah Island, South Carolina: Implication for Suburban habitat preservation	Roberts	2002	2005	2003.5	2007	Thesis: University of Georgia	0	0	1	215	Carnivora	Felidae	Lynx	rufus	6390	28.4	Adult	32.6217	-80.0632	2	2	2	0	1	0
Roles of maternal condition and predation in survival of juvenile elk in Oregon	Johnson	2002	2005	2003.5	2020	Wildlife Monographs	201	0	3	60	Artiodactyla	Cervidae	Cervus	elaphus	240000	50.5	Juvenile	43.106	-122.672	56	48	2	0	0	43
Wolverine, Gulo gulo, Home range size and denning habitat in Lowland Boreal Forest in Ontario	Dawson	2003	2004	2003.5	2010	Canadian Field Naturalist	124	2	139	144	Carnivora	Mustelidae	Gulo	gulo	12800	344	Adult	51.0711	-93.6796	3	3	3	0	1	0
Sources and Patterns of Wolverine Mortality in Western Montana	Squires	2002	2005	2003.5	2007	The Journal of Wildlife Management	71	7	2213	2220	Carnivora	Mustelidae	Gulo	gulo	12800	344	Adult	44.782	-114.917	14	13	9	9	0	1
Demography and ecology of a declining endemic: The Olympic marmot	Griffin	2002	2006	2004	2008	Thesis: University of Montana	0	0	1	190	Rodentia	Sciuridae	Marmota	olympus	6300	-999	Adult	47.812	-123.563	32	29	0	0	0	29
Fox Squirrel Survival in Urban and Rural Environments	McCleery	2003	2005	2004	2008	The Journal of Wildlife Management	72	1	133	137	Rodentia	Sciuridae	Sciurus	niger	-999	0.2	Adult	30.6154	-96.3418	40	30	20	0	15	10
Spatial Ecology, Survival and Cause-Specific Mortality of Gray Foxes in a longleaf pine ecosystem	Temple	2002	2006	2004	2010	The American Midland Natrualist	163	2	413	422	Carnivora	Canidae	Urocyon	cinereoargenteus	3830	1.64	Adult	31.2479	-84.3737	16	12	10	2	8	1
Space Use and Survival of White-Tailed Deer in an Exurban Landscape	Storm	2003	2005	2004	2007	The Journal of Wildlife Management	71	4	1170	1176	Artiodactyla	Cervidae	Odocoileus	virginianus	75000	1.84	Adult	37.6663	-89.167	7	7	7	6	1	0
Chronic wasting disease detection and mortality sources in semi-protected deer population	Schuler	2003	2005	2004	2018	Wildlife Biology	2018	1	1	7	Artiodactyla	Cervidae	Odocoileus	hemionus	83800	1.99	Adult	43.6319	-103.416	28	22	12	9	3	10
Survival of Unexploited Raccoons on a Rural Refuge in Southern Illinois	Urbanek	2003	2005	2004	2009	Transactions of the Illinois Academy of Sciences	102	3	217	223	Carnivora	Procyonidae	Procyon	lotor	6370	4.13	Adult	37.3984	-89.3153	12	8	1	0	1	2
Swift Fox response to prescribed fire in shortgrass steppe	Thompson	2003	2005	2004	2008	Western North American Naturalist	68	2	251	256	Carnivora	Canidae	Vulpes	velox	2140	6.51	Adult	37.4589	-102.601	2	2	1	0	1	1
Dispersal, survival, and reproduction of wild-born, yearling swift foxes in a reintroduced population	Ausband	2003	2005	2004	2007	Canadian Journal of Zoology	85	2	185	189	Carnivora	Canidae	Vulpes	velox	2140	6.51	Juvenile	48.7682	-112.956	15	14	2	0	2	12
Fisher Survival in Eastern Ontario	Koen	2003	2005	2004	2007	The Journal of Wildlife Management	71	4	1214	1219	Carnivora	Mustelidae	Martes	pennanti	3750	15	Adult	44.8351	-75.4835	28	20	12	9	0	0
Evaluating Survival and Demography of a Bighorn Sheep Population	Jokinen	2003	2005	2004	2008	Bienn Symp North Wild Sheep and Goat Counc	16	0	138	159	Artiodactyla	Bovidae	Ovis	canadensis	74600	16.2	Adult	49.4718	-113.973	11	10	0	0	0	7
Monitoring survival of young in ungulates: a case study with Rocky Mountain Elk	Harris	2002	2006	2004	2006	Thesis: University of Montana	0	0	1	32	Artiodactyla	Cervidae	Cervus	elaphus	240000	50.5	Juvenile	46.8081	-113.427	41	40	1	0	0	27
Effects of predator treatments, individual traits, and environment on moose survival in Alaska	Keech	2001	2007	2004	2011	The Journal of Wildlife Management	75	6	1361	1380	Artiodactyla	Cervidae	Alces	alces	481000	64.2	Adult	62.9791	-155.547	14	14	4	3	0	5
Effects of predator treatments, individual traits, and environment on moose survival in Alaska	Keech	2001	2007	2004	2011	The Journal of Wildlife Management	75	6	1361	1380	Artiodactyla	Cervidae	Alces	alces	481000	64.2	Juvenile	62.9791	-155.547	267	257	7	7	0	202
Pieces of the pygmy rabbit puzzle: Space use, survival, and survey indicators	Sanchez	2004	2005	2004.5	2007	Thesis: University of Idaho	0	0	1	146	Lagomorpha	Leporidae	Brachylagus	idahoensis	443	0.00328	Adult	45.2059	-113.842	102	102	2	2	0	42
Natal dispersal by pygmy rabbits	Estes-Zumpf	2004	2005	2004.5	2009	Journal of Mammalogy	90	2	363	372	Lagomorpha	Leporidae	Brachylagus	idahoensis	443	0.00328	Juvenile	44.7809	-113.493	41	26	0	0	0	26
Survival of Juvenile Pygmy Rabbits	Price	2004	2005	2004.5	2010	The Journal of Wildlife Management	74	1	43	47	Lagomorpha	Leporidae	Brachylagus	idahoensis	443	0.00328	Juvenile	45.1882	-113.885	26	18	0	0	0	18
An assessment of quality deer management on a private hunt club in the Virginia Piedmont	Batts	2003	2006	2004.5	2008	Thesis: Virginia Polytechnic Institute and State University	0	0	1	111	Artiodactyla	Cervidae	Odocoileus	virginianus	75000	1.84	Adult	37.3772	-78.089	3	3	3	3	0	0
Survival of White Tailed Deer in Wisconsin's Chronic Wasting Disease Zone	Magle	2003	2006	2004.5	2012	The Northeastern Naturalist	19	1	67	76	Artiodactyla	Cervidae	Odocoileus	virginianus	75000	1.84	Adult	43.1152	-89.8222	53	45	39	38	1	1
An assessment of quality deer management on a private hunt club in the Virginia Piedmont	Batts	2003	2006	2004.5	2008	Thesis: Virginia Polytechnic Institute and State University	0	0	1	111	Artiodactyla	Cervidae	Odocoileus	virginianus	75000	1.84	Juvenile	37.3772	-78.089	10	10	1	0	1	0
Survival of White Tailed Deer in Wisconsin's Chronic Wasting Disease Zone	Magle	2003	2006	2004.5	2012	The Northeastern Naturalist	19	1	67	76	Artiodactyla	Cervidae	Odocoileus	virginianus	75000	1.84	Juvenile	43.1152	-89.8222	18	10	5	5	0	1
Survival of Neonatal White-Tailed Deer in an Exurban Population	Saalfeld	2004	2005	2004.5	2007	The Journal of Wildlife Management	71	3	940	944	Artiodactyla	Cervidae	Odocoileus	virginianus	75000	1.84	Juvenile	32.633	-85.5551	24	17	0	0	0	10
Ecology of common raccoon (Procyon lotor) in Western Pennsylvania as related to an oral rabies vaccination program	Compton	2003	2006	2004.5	2007	Thesis: Pennsylvania State University	0	0	1	105	Carnivora	Procyonidae	Procyon	lotor	6370	4.13	Adult	41.2972	-80.3283	30	28	27	4	14	0
Mortality sources and spatial partitioning among mountain caribou, moose, and wolves in the northern Columbia Mountains	Stotyn	2003	2006	2004.5	2007	Rept to Columbia Basin Fish and Wild Comp Prog	0	0	1	48	Carnivora	Canidae	Canis	lupus	35000	21.8	Adult	51.0353	-118.661	3	2	1	0	0	0
Direct Estimation of Early Survival and Movements in Eastern Wolf Pups	Mills	2004	2005	2004.5	2008	The Journal of Wildlife Management	72	4	949	954	Carnivora	Canidae	Canis	lupus	35000	21.8	Juvenile	45.8393	-78.3692	8	6	1	1	0	1
Habitat selection by black bears in an intensively logged boreal forest	Brodeur	2004	2005	2004.5	2008	Canadian Journal of Zoology	86	11	1307	1316	Carnivora	Ursidae	Ursus	americanus	111000	27.9	Adult	47.5666	-71.1997	3	3	3	2	1	0
Estimating population size and density of a low-density population of black bears in Rocky Mountain National Park, Colorado	Baldwin	2003	2006	2004.5	2012	European Journal of Wildlife Research	58	3	557	566	Carnivora	Ursidae	Ursus	americanus	111000	27.9	Adult	40.4471	-105.867	4	2	2	2	0	0
Roles of maternal condition and predation in survival of juvenile elk in Oregon	Johnson	2002	2007	2004.5	2019	Wildlife Monographs	201	0	3	60	Artiodactyla	Cervidae	Cervus	elaphus	240000	50.5	Juvenile	45.7382	-177.324	236	227	6	0	0	217
Population demographics and dynamics of colonizing elk in a desert grassland-scrubland	Bender	2003	2006	2004.5	2010	Journal of Fish and Wildlife Management	1	2	152	160	Artiodactyla	Cervidae	Cervus	elaphus	240000	50.5	Adult	36	-108.001	5	2	2	2	0	0
Elk Survival and Mortality Causes in the Blue Mountains of Washington	McCorquodale	2003	2006	2004.5	2011	The Journal of Wildlife Management	75	4	897	904	Artiodactyla	Cervidae	Cervus	elaphus	240000	50.5	Adult	46.2264	-117.915	31	27	14	14	0	5
Elk Calf Survival and Mortality following Wolf Restoration to Yellowstone National Park	Barber-Meyer	2003	2006	2004.5	2008	Wildlife Monographs	69	1	1	30	Artiodactyla	Cervidae	Cervus	elaphus	240000	50.5	Juvenile	44.6361	-110.568	104	104	1	1	0	98
Elk Survival and Mortality Causes in the Blue Mountains of Washington	McCorquodale	2003	2006	2004.5	2011	The Journal of Wildlife Management	75	4	897	904	Artiodactyla	Cervidae	Cervus	elaphus	240000	50.5	Juvenile	46.2264	-117.915	45	43	37	37	0	3
Mortality sources and spatial partitioning among mountain caribou, moose, and wolves in the northern Columbia Mountains	Stotyn	2003	2006	2004.5	2007	Rept to Columbia Basin Fish and Wild Comp Prog	0	0	1	48	Artiodactyla	Cervidae	Alces	alces	481000	64.2	Adult	51.0353	-118.661	5	4	1	1	0	3
Source populations in carnivore management: cougar demography and emigration in a lightly hunted population	Cooley	2002	2007	2004.5	2009	Animal Conservation	12	4	321	328	Carnivora	Felidae	Puma	concolor	53900	118	Adult	47.2084	-120.917	10	10	7	5	2	0
Effects of male trophy hunting on female carnivore population growth and persistence	Wielgus	2002	2007	2004.5	2013	Biological Conservation	167	2	69	75	Carnivora	Felidae	Puma	concolor	53900	118	Adult	48.6657	-118.008	14	14	8	8	0	0
Source populations in carnivore management: cougar demography and emigration in a lightly hunted population	Cooley	2002	2007	2004.5	2009	Animal Conservation	12	4	321	328	Carnivora	Felidae	Puma	concolor	53900	118	Juvenile	47.2084	-120.917	8	8	3	2	1	0
Effects of male trophy hunting on female carnivore population growth and persistence	Wielgus	2002	2007	2004.5	2013	Biological Conservation	167	2	69	75	Carnivora	Felidae	Puma	concolor	53900	118	Juvenile	48.6657	-118.008	48	48	31	31	0	0
Mortality sources and spatial partitioning among mountain caribou, moose, and wolves in the northern Columbia Mountains	Stotyn	2003	2006	2004.5	2007	Rept to Columbia Basin Fish and Wild Comp Prog	0	0	1	48	Artiodactyla	Cervidae	Rangifer	tarandus	108000	2400	Adult	51.0353	-118.661	51	37	1	0	1	26
Role of predation and hunting on eastern cottontail mortality at Cape Cod National Seashore, MA	Boland	2004	2006	2005	2008	Canadian Journal of Zoology	86	8	918	927	Lagomorpha	Leporidae	Sylvilagus	floridanus	1210	0.01	Adult	41.9683	-70.0541	98	88	17	10	0	71
Demography and dispersal of thirteen-lined ground squirrels in relation to prairie dogs in Colorado shortgrass steppe	Benson	2005	2005	2005	2008	Thesis: California State University	0	0	1	70	Rodentia	Sciuridae	Spermophilus	tridecemlineatus	175	0.01	Juvenile	40.7578	-104.03	1	1	0	0	0	1
Demography and dispersal of thirteen-lined ground squirrels in relation to prairie dogs in Colorado shortgrass steppe	Benson	2005	2005	2005	2008	Thesis: California State University	0	0	1	70	Rodentia	Sciuridae	Spermophilus	tridecemlineatus	175	0.01	Juvenile	40.7578	-104.03	11	11	0	0	0	5
Demography of Unexploited Beavers in Southern Illinois	Bloomquist	2004	2006	2005	2010	The Journal of Wildlife Management	74	2	228	235	Rodentia	Castoridae	Castor	canadensis	18100	0.05	Adult	37.39	-89.3714	15	9	3	2	0	2
Survival, Home Range, and Colony Reproduction of beavers in East-central Illinois, an agricultural landscape	Havens	2004	2006	2005	2013	The American Midland Natrualist	169	1	17	29	Rodentia	Castoridae	Castor	canadensis	18100	0.05	Adult	39.6833	-88.3995	24	18	11	10	1	0
Age-specific Survival and Space Use of White-Tailed Deer in Southern Michigan	Hiller	2004	2006	2005	2008	Michigan Academian	38	0	101	119	Artiodactyla	Cervidae	Odocoileus	virginianus	75000	1.84	Adult	42.2119	-84.2936	13	13	12	11	1	0
Age-specific Survival and Space Use of White-Tailed Deer in Southern Michigan	Hiller	2004	2006	2005	2008	Michigan Academian	38	0	101	119	Artiodactyla	Cervidae	Odocoileus	virginianus	75000	1.84	Juvenile	42.2119	-84.2936	17	15	8	4	4	5
Protection from harvesting restores the natural social structure of eastern wolf packs	Rutledge	2003	2007	2005	2010	Biological Conservation	143	2	332	339	Carnivora	Canidae	Canis	lupus	35000	21.8	Adult	45.794	-77.3838	31	31	5	0	0	0
Home Range, Habitat Use, and Food Habits of the black bear in South-Central Florida	Ulrey	2004	2006	2005	2008	Thesis: University of Kentucky	0	0	1	117	Carnivora	Ursidae	Ursus	americanus	111000	27.9	Adult	27.1833	-81.3587	6	5	5	1	4	0
Factors Influencing Survival of Female elk in a Harvested Population	Conard	2003	2007	2005	2012	Journal of Fish and Wildlife Management	3	2	199	208	Artiodactyla	Cervidae	Cervus	elaphus	240000	50.5	Adult	39.1091	-96.8164	8	8	7	7	0	0
Condition, Survival and Productivity of Elk in the Sacramento Mountains of New Mexico	Halbritter	2003	2007	2005	2011	The Southwestern Naturalist	56	3	305	314	Artiodactyla	Cervidae	Cervus	elaphus	240000	50.5	Adult	32.8554	-105.712	16	16	13	13	0	0
Temperature mediated moose survival in Northeastern Minnesota	Lenarz	2002	2008	2005	2009	The Journal of Wildlife Management	73	4	503	510	Artiodactyla	Cervidae	Alces	alces	481000	64.2	Adult	47.4915	-91.4349	80	80	25	17	8	5
Movements, resource selection, and risk analysis for parasitic disease in an expanding moose population in the northern Great Plains	Mackey	2004	2006	2005	2008	Thesis: University of South Dakota	0	0	1	120	Artiodactyla	Cervidae	Alces	alces	481000	64.2	Adult	48.9567	-100.078	4	3	1	1	0	0
Emerging factors associated with the decline of a gray fox population and multi-scale land cover associations of mesopredators in the Chicago metropolitan area	Willingham	2004	2007	2005.5	2008	Thesis: The Ohio State University	0	0	1	149	Carnivora	Canidae	Urocyon	cinereoargenteus	3830	1.64	Adult	42.0978	-87.9177	5	4	1	0	1	1
Balancing white-tailed deer ecology with Michigan National Guard Training at Fort Custer Training Center in Augusta, MI	Humphries	2004	2007	2005.5	2011	Thesis: Michigan State University	0	0	1	150	Artiodactyla	Cervidae	Odocoileus	virginianus	75000	1.84	Adult	42.3273	-85.3536	19	19	14	14	0	3
Growth and Mortality of Sympatric White-Tailed and Mule Deer Fawns	Haskell	2004	2007	2005.5	2017	The Journal of Wildlife Management	81	8	1417	1429	Artiodactyla	Cervidae	Odocoileus	virginianus	75000	1.84	Juvenile	30.97	-101.262	96	95	0	0	0	47
Balancing white-tailed deer ecology with Michigan National Guard Training at Fort Custer Training Center in Augusta, MI	Humphries	2004	2007	2005.5	2011	Thesis: Michigan State University	0	0	1	150	Artiodactyla	Cervidae	Odocoileus	virginianus	75000	1.84	Juvenile	42.3273	-85.3536	14	13	8	7	1	3
Use of urban landscapes by coyotes	Grubbs	2005	2006	2005.5	2009	The Southwestern Naturalist	54	1	1	12	Carnivora	Canidae	Canis	latrans	12000	16.8	Adult	32.2006	-111.039	6	4	4	0	3	0
Home Range, Habitat Use and Survival of Coyotes in Western South Carolina	Schrecengost	2005	2006	2005.5	2009	The American Midland Natrualist	162	2	346	355	Carnivora	Canidae	Canis	latrans	12000	16.8	Adult	33.3335	-81.7244	10	8	6	6	0	0
Demography of a harvested population of wolves in west-central Alberta	Webb	2003	2008	2005.5	2011	Canadian Journal of Zoology	89	8	744	752	Carnivora	Canidae	Canis	lupus	35000	21.8	Adult	51.8112	-115.425	42	42	38	37	1	0
Habitat selection, condition and survival of Shiras moose in northwest Wyoming	Becker	2005	2006	2005.5	2008	Thesis: University of Wyoming	0	0	1	218	Artiodactyla	Cervidae	Alces	alces	481000	64.2	Adult	43.7906	-110.683	38	21	7	5	2	8
Disappearance and Mortality Causes in Thirteen-lined Ground squirrel juveniles	Freeman	2005	2007	2006	2016	The American Midland Natrualist	176	0	130	146	Rodentia	Sciuridae	Spermophilus	tridecemlineatus	175	0.01	Juvenile	40.9925	-96.8973	49	38	3	0	0	35
Eastern Spotted Skunk Survival and Cause-specific Mortality in the Ouachita Mountains, Arkansas	Lesmeister	2005	2007	2006	2010	The American Midland Natrualist	164	1	52	60	Carnivora	Mephitidae	Spilogale	putorius	569	0.26	Adult	34.633	-93.5804	19	17	0	0	0	17
Surveying and habitat modeling for gray foxes in Illinois	Cooper	2005	2007	2006	2008	Thesis: Southern Illinois University Carbondale	0	0	1	56	Carnivora	Canidae	Urocyon	cinereoargenteus	3830	1.64	Adult	37.6902	-89.078	4	3	0	0	0	2
Effects of Hunter Activities on Deer Movements and Harvest	Keenan	2005	2007	2006	2008	Report to National Fish and Wildlife Foundation	0	0	1	49	Artiodactyla	Cervidae	Odocoileus	virginianus	75000	1.84	Adult	41.2285	-77.2772	47	37	32	27	5	0
Effects of Hunter Activities on Deer Movements and Harvest	Keenan	2005	2007	2006	2008	Report to National Fish and Wildlife Foundation	0	0	1	49	Artiodactyla	Cervidae	Odocoileus	virginianus	75000	1.84	Adult	40.0926	-77.7278	70	58	54	48	6	0
Condition, Survival and productivity of mule deer in semiarid grassland-woodland in east-central New Mexico	Bender	2005	2007	2006	2010	Human-Wildlife Interactions	5	2	276	286	Artiodactyla	Cervidae	Odocoileus	hemionus	83800	1.99	Adult	34.2888	-105.434	22	16	0	0	0	2
Factors influencing survival of desert mule deer in the greater San Andres Mountains, New Mexico	Bender	2003	2009	2006	2012	Human-Wildlife Interactions	6	2	245	260	Artiodactyla	Cervidae	Odocoileus	hemionus	83800	1.99	Adult	34.2888	-105.434	72	58	4	1	3	15
The behavioral ecology and population characteristics of striped skunks inhabitng piping plover nesting beaches on the island of Marthas vineyard Massachusetts	Johnson	2004	2008	2006	2016	Thesis: Antioch University	0	0	1	117	Carnivora	Mephitidae	Mephitis	mephitis	2400	2.01	Adult	41.3945	-70.6306	21	21	12	0	0	2
Survival and Cause-Specific Mortality of Pronghorn in Southwestern North Dakota	Kolar	2004	2008	2006	2012	The American Midland Natrualist	167	1	164	173	Artiodactyla	Antilocapridae	Antilocapra	americana	46900	9.68	Adult	46.142	-103.598	112	92	77	70	6	3
Spatial ecology and male swamp rabbits (Sylvilagus aquaticus) in southeastern Arkansas	Vale	2006	2007	2006.5	2008	Thesis: University of Arkansas at Monticello	0	0	1	149	Lagomorpha	Leporidae	Sylvilagus	aquaticus	2140	0.01	Adult	33.4311	-91.9691	7	5	1	1	0	4
Winter home range and habitat use by porcupines in Alaska	Coltrane	2005	2008	2006.5	2013	The Journal of Wildlife Management	77	3	505	513	Rodentia	Erethizonidae	Erethizon	dorsatum	7420	0.1	Adult	61.7784	-149.694	4	4	1	1	0	1
Effects of Roads on Survival of San Clemente Island Foxes	Snow	2006	2007	2006.5	2012	The Journal of Wildlife Management	76	2	243	252	Carnivora	Canidae	Urocyon	littoralis	1920	0.38	Adult	32.8837	-118.478	15	12	8	0	8	0
Movement and Habitat Use of Sika and white-tailed deer on Assateague Island National Seashore, Maryland	Christensen	2006	2007	2006.5	2010	Thesis: Pennsylvania State University	0	0	1	105	Artiodactyla	Cervidae	Cervus	nippon	240000	0.57	Adult	38.1429	-75.1761	14	14	13	13	0	0
Movement and Habitat Use of Sika and white-tailed deer on Assateague Island National Seashore, Maryland	Christensen	2006	2007	2006.5	2010	Thesis: Pennsylvania State University	0	0	1	105	Artiodactyla	Cervidae	Odocoileus	virginianus	75000	1.84	Adult	38.1429	-75.1761	4	4	4	4	0	0
Population demographics and space use of white-tailed deer in the northern lower peninsula of Michigan	Stroud	2005	2008	2006.5	2009	Thesis: Southern Illinois University Carbondale	0	0	1	57	Artiodactyla	Cervidae	Odocoileus	virginianus	75000	1.84	Adult	44.2602	-86.1137	23	21	14	9	4	4
White-tailed deer movement and habitat interactions prior to death in central New York	Whitman	2006	2007	2006.5	2012	Thesis: SUNY Syracuse	0	0	1	58	Artiodactyla	Cervidae	Odocoileus	virginianus	75000	1.84	Adult	42.9771	-75.7154	14	13	13	11	2	0
Adult Pronghorn Survival and Cause-Specific Mortality in Custer State Park	Keller	2005	2008	2006.5	2013	Wildlife Society Bulletin	33	1	311	322	Artiodactyla	Antilocapridae	Antilocapra	americana	46900	9.68	Adult	43.6614	-103.39	23	16	0	0	0	16
Reproduction, recruitment, and dispersal of fishers in a managed Douglas-fir forest in California	Matthews	2005	2008	2006.5	2013	Journal of Mammalogy	94	1	100	108	Carnivora	Mustelidae	Martes	pennanti	3750	15	Adult	41.0546	-123.66	6	6	0	0	0	5
Reproduction, recruitment, and dispersal of fishers in a managed Douglas-fir forest in California	Matthews	2005	2008	2006.5	2013	Journal of Mammalogy	94	1	100	108	Carnivora	Mustelidae	Martes	pennanti	3750	15	Juvenile	41.0546	-123.66	3	2	0	0	0	0
Alteration of behavior by desert bighorn sheep from human recreation and desert bighorn sheep survival in Canyonlands National Park: 2002-2010	Sproat	2002	2011	2006.5	2012	Thesis: Brigham Young University	0	0	1	31	Artiodactyla	Bovidae	Ovis	canadensis	74600	16.2	Adult	38.3268	-109.878	9	9	1	0	1	4
Density-independent predation affects migrants and residents equally in a declining partially migratory elk population	Hebblewhite	2002	2011	2006.5	2018	Oikos	127	0	1304	1318	Artiodactyla	Cervidae	Cervus	elaphus	240000	50.5	Adult	51.6266	-115.377	104	61	24	11	13	37
Spatial ecology and population dynamics of Tule Elk at Point Reyes National Seashore	Cobb	2005	2008	2006.5	2010	Thesis: University of California Berkeley	0	0	1	202	Artiodactyla	Cervidae	Cervus	elaphus	240000	50.5	Adult	38.0244	-122.83	10	9	0	0	0	1
Spatial ecology and population dynamics of Tule Elk at Point Reyes National Seashore	Cobb	2005	2008	2006.5	2010	Thesis: University of California Berkeley	0	0	1	202	Artiodactyla	Cervidae	Cervus	elaphus	240000	50.5	Juvenile	38.0244	-122.83	20	10	0	0	0	2
Rates of Survival and Sources of mortality of cougars in hunted populations in north-central Arizona	McKinney	2006	2007	2006.5	2009	The Southwestern Naturalist	54	2	151	155	Carnivora	Felidae	Puma	concolor	53900	118	Adult	34.2796	-111.591	8	8	6	5	1	2
Survival and Dispersal of white-tailed deer in the agricultural landscape of east-central Illinois	Anderson	2005	2009	2007	2015	Wildlife Biology in Practice	11	1	26	41	Artiodactyla	Cervidae	Odocoileus	virginianus	75000	1.84	Adult	39.4952	-88.7404	39	34	33	27	6	1
Population Viability and Connectivity of the Louisiana Black Bear (Ursus americanus luteolus)	Laufenberg	2002	2012	2007	2014	USGS Open File Report 2014-1229	0	0	1	105	Carnivora	Ursidae	Ursus	americanus	111000	27.9	Adult	31.273	-91.7429	8	8	7	4	3	0
Population Viability and Connectivity of the Louisiana Black Bear (Ursus americanus luteolus)	Laufenberg	2002	2012	2007	2014	USGS Open File Report 2014-1228	0	0	1	105	Carnivora	Ursidae	Ursus	americanus	111000	27.9	Adult	32.229	-91.4473	3	2	2	0	2	0
Survival and cause-specific mortality of elk calves in a predator rich environment	DeVivo	2005	2009	2007	2011	Wildlife Biology	17	2	156	165	Artiodactyla	Cervidae	Cervus	elaphus	240000	50.5	Juvenile	41.3628	-79.0663	15	9	7	5	2	0
Implications of Chronic Wasting Disease, Cougar Predation, and reduced recruitment for elk management	Sargeant	2005	2009	2007	2011	The Journal of Wildlife Management	75	1	171	177	Artiodactyla	Cervidae	Cervus	elaphus	240000	50.5	Juvenile	43.6036	-103.418	28	28	14	13	1	6
Effects of Black Bear Relocation on Elk Calf Recruitment at Great Smoky Mountains National Park	Yarkovich	2006	2008	2007	2011	The Journal of Wildlife Management	75	5	1145	1154	Artiodactyla	Cervidae	Cervus	elaphus	240000	50.5	Juvenile	35.4348	-83.0229	11	7	1	0	1	5
Recolonizing wolves influence the realized niche of resident cougars	Elbroch	2002	2012	2007	2015	Zoological Studies	54	0	2	11	Carnivora	Felidae	Puma	concolor	53900	118	Adult	44.0902	-110.096	45	40	20	17	0	0
Survival and Mortality of Pumas in a Fragmented, Urbanizing landscape	Vickers	2001	2013	2007	2015	Plos One	10	7	0	0	Carnivora	Felidae	Puma	concolor	53900	118	Adult	34.0968	-118.817	31	26	17	4	6	0
Recolonizing wolves influence the realized niche of resident cougars	Elbroch	2002	2012	2007	2015	Zoological Studies	54	0	2	11	Carnivora	Felidae	Puma	concolor	53900	118	Juvenile	44.0902	-110.096	26	21	1	0	0	7
Anthropogenic factors affecting mountain lions in the Black Hills of South Dakota	Jansen	2005	2009	2007	2011	Thesis: South Dakota State University	0	0	1	124	Carnivora	Felidae	Puma	concolor	53900	118	Juvenile	44.0903	-103.771	34	34	7	0	0	0
Survival and mortality of the Arizona gray squirrel	Cudworth	2007	2008	2007.5	2014	The Southwestern Naturalist	59	3	423	426	Rodentia	Sciuridae	Sciurus	arizonensis	647	-999	Adult	31.5458	-110.353	8	5	2	1	1	3
Predation by Coyotes on White-Tailed Deer Neonates in South Carolina	Kilgo	2006	2009	2007.5	2012	The Journal of Wildlife Management	76	7	1420	1430	Artiodactyla	Cervidae	Odocoileus	virginianus	75000	1.84	Adult	33.337	-81.7597	3	3	3	0	3	0
Population characteristics of a white-tailed deer herd in a bottomland hardwood forest of south central Louisiana	Thayer	2007	2008	2007.5	2009	Thesis: Louisiana State University	0	0	1	41	Artiodactyla	Cervidae	Odocoileus	virginianus	75000	1.84	Adult	30.4269	-91.5674	24	24	20	18	2	0
The Effect of predation on white-tailed deer recruitment at the Joseph W. Jones Research Center	Howze	2007	2008	2007.5	2002	Thesis: University of Georgia	0	0	1	64	Artiodactyla	Cervidae	Odocoileus	virginianus	75000	1.84	Juvenile	31.249	-84.3794	9	6	0	0	0	6
Influence of hair loss syndrome on black-tailed deer fawn survival	McCoy	2006	2009	2007.5	2014	The Journal of Wildlife Management	78	7	1177	1188	Artiodactyla	Cervidae	Odocoileus	hemionus	83800	1.99	Juvenile	48.1705	-124.378	129	124	3	0	0	96
Survival of desert mule deer fawns in central arizona	Quintana	2007	2008	2007.5	2016	The Southwestern Naturalist	61	2	93	100	Artiodactyla	Cervidae	Odocoileus	hemionus	83800	1.99	Juvenile	33.707	-111.343	24	21	0	0	0	14
Survival and Causes of mortality for fisher and marten in Minnesota	Erb	2007	2008	2007.5	2013	Summaries of Research Findings 2011	0	0	64	73	Carnivora	Mustelidae	Martes	americana	882	3.7	Adult	47.6022	-92.3528	14	14	4	2	1	8
Survival and Causes of mortality for fisher and marten in Minnesota	Erb	2007	2008	2007.5	2013	Summaries of Research Findings 2011	0	0	64	73	Carnivora	Mustelidae	Martes	pennanti	3750	15	Adult	47.6022	-92.3528	7	7	1	1	0	5
A protected area influences genotype-specific survival and the structure of a Canis hybrid zone	Benson	2004	2011	2007.5	2014	Ecology	95	2	254	264	Carnivora	Canidae	Canis	latrans	12000	16.8	Adult	45.7367	-78.6575	49	44	37	29	8	0
A protected area influences genotype-specific survival and the structure of a Canis hybrid zone	Benson	2004	2011	2007.5	2014	Ecology	95	2	254	264	Carnivora	Canidae	Canis	latrans	12000	16.8	Adult	45.436	-79.5072	10	7	2	0	2	0
Survival and Cause-specific mortality of female Rocky Mountain elk exposed to human activity	Webb	2006	2009	2007.5	2011	Population Ecology	53	3	483	493	Artiodactyla	Cervidae	Cervus	elaphus	240000	50.5	Adult	36.7833	-105.616	37	28	28	26	1	0
Assessment of the status and viability of a population of moose at its southern range limit in Ontario	Murray	2006	2009	2007.5	2012	Canadian Journal of Zoology	90	3	422	434	Artiodactyla	Cervidae	Alces	alces	481000	64.2	Adult	45.9428	-77.8011	21	14	5	4	1	0
Status, movements, and habitat use of moose in Massachusetts	Wattle	2006	2009	2007.5	2011	Thesis: University of Massachusetts Amherst	0	0	1	115	Artiodactyla	Cervidae	Alces	alces	481000	64.2	Adult	42.6643	-72.6628	5	5	2	2	0	0
Patterns of mortality in a wild population of white-footed mice	Collins	2008	2008	2008	2014	The Northeastern Naturalist	21	2	323	336	Rodentia	Cricetidae	Peromyscus	leucopus	18.1	0.000802	Adult	42.7189	-73.8615	15	15	0	0	0	14
Survival, Habitat Selection, and Body Condition of the Woodchuck across an Urban-Rural Gradient	Hellgren	2007	2009	2008	2001	The American Midland Natrualist	165	1	150	161	Rodentia	Sciuridae	Marmota	monax	3880	0.01	Adult	37.7145	-89.2206	3	2	0	0	0	2
Survival and antipredator behavior of woodchucks along an urban-agricultural gradient	Lehrer	2007	2009	2008	2012	Canadian Journal of Zoology	90	1	12	21	Rodentia	Sciuridae	Marmota	monax	3880	0.01	Adult	40.1078	-88.2391	26	17	7	0	5	7
Landscape Ecology of Mule Deer and White-Tailed Deer with implications for chronic wasting disease	Nobert	2006	2010	2008	2012	Thesis: Univesity of Alberta	0	0	1	179	Artiodactyla	Cervidae	Odocoileus	virginianus	75000	1.84	Adult	52.6825	-110.031	79	53	44	40	4	8
Survival of White-Tailed Deer Fawns in the Grasslands of the Northern Great Plains	Grovenburg	2007	2009	2008	2012	The Journal of Wildlife Management	76	5	944	956	Artiodactyla	Cervidae	Odocoileus	virginianus	75000	1.84	Juvenile	45.1222	-98.9194	23	23	6	2	1	12
Factors Influencing Survival of White-Tailed Deer Fawns in Coastal South Carolina	McCoy	2006	2010	2008	2013	Journal of Fish and Wildlife Management	4	2	280	289	Artiodactyla	Cervidae	Odocoileus	virginianus	75000	1.84	Juvenile	33.1565	-80.4234	66	44	0	0	0	44
Demographics, diet, movements, and survival of an isolated, unmanaged raccoon population on the Outer Banks of North Carolina	Parsons	2007	2009	2008	2013	Mammalia	77	1	21	30	Carnivora	Procyonidae	Procyon	lotor	6370	4.13	Adult	34.7881	-76.3893	12	5	2	0	0	0
Ecotypic Variation in Population Dynamics of Reintroduced Bighorn Sheep	Bleich	2000	2016	2008	2017	The Journal of Wildlife Management	82	1	8	18	Artiodactyla	Bovidae	Ovis	canadensis	74600	16.2	Adult	46.7257	-103.48	55	54	3	1	0	18
Human Predation risk and elk behavior in heterogeneous landscapes	Cleveland	2007	2009	2008	2010	Thesis: University of Montana	0	0	1	101	Artiodactyla	Cervidae	Cervus	elaphus	240000	50.5	Adult	47.0958	-113.84	5	5	4	4	0	1
Human Predation Risk Effects on Adult, Male White-Tailed Deer Antipredator Behavior	Little	2008	2009	2008.5	2011	Thesis: Mississippi State University	0	0	1	103	Artiodactyla	Cervidae	Odocoileus	virginianus	75000	1.84	Adult	34.009	-97.2706	11	11	10	9	1	0
Factors influencing survival and productivity of pronghorn in a semiarid grass-woodland in east-central New Mexico	Bender	2006	2011	2008.5	2013	Human-Wildlife Interactions	7	2	313	324	Artiodactyla	Antilocapridae	Antilocapra	americana	46900	9.68	Adult	34.2501	-105.421	37	34	6	6	0	1
Anthropogenic mortality, intraspecific competition, and prey availability influence territory size of wolves in Montana	Rich	2008	2009	2008.5	2012	Journal of Mammalogy	93	3	722	731	Carnivora	Canidae	Canis	lupus	35000	21.8	Adult	46.5662	-112.074	7	7	7	0	0	0
Evidence for source-sink dynamics in a regional population of arctic ground squirrels	Donker	2009	2009	2009	2012	Wildlife Research	39	2	163	170	Rodentia	Sciuridae	Urocitellus	parryii	500	0.00703	Juvenile	61.292	-138.613	8	8	0	0	0	8
Spatial ecology and survival of subadult male sika deer on Maryland's eastern shore	Kalb	2008	2010	2009	2010	Thesis: University of Delaware	0	0	1	38	Artiodactyla	Cervidae	Cervus	nippon	240000	0.57	Juvenile	38.4485	-76.0486	8	8	8	7	1	0
Coyote removal, understory cover, and survival of white-tailed deer neonates	Kilgo	2006	2012	2009	2014	The Journal of Wildlife Management	78	7	1261	1271	Artiodactyla	Cervidae	Odocoileus	virginianus	75000	1.84	Juvenile	33.337	-81.7597	151	148	1	0	1	131
Bobcats in New Hampshire: Understanding the relationships between habitat suitability, connectivity, and abundance in a changing landscape	Reed	2008	2010	2009	2013	Thesis: University of New Hampshire	0	0	1	114	Carnivora	Felidae	Lynx	rufus	6390	28.4	Adult	42.8266	-72.2396	2	2	2	0	1	0
Survival and Population Growth of a Free-Ranging Elk Population with a long history of exposure to chronic wasting disease	Monello	2008	2010	2009	2014	The Journal of Wildlife Management	78	2	214	223	Artiodactyla	Cervidae	Cervus	elaphus	240000	50.5	Adult	40.5889	-105.966	29	22	11	10	1	2
Can supplemental food increase winter survival of a threatened cottontail rabbit?	Weidman	2009	2010	2009.5	2011	Biological Conservation	144	7	2054	2058	Lagomorpha	Leporidae	Sylvilagus	transitionalis	815	0.00413	Adult	43.0013	-70.9005	10	10	0	0	0	9
Ringtail Ecology and Behavior in New Mexico, USA	Harrison	2008	2011	2009.5	2012	Western North American Naturalist	72	4	495	506	Carnivora	Procyonidae	Bassariscus	astutus	1020	0.66	Adult	34.3337	-106.979	12	12	1	0	0	9
Survival Rates of Female white-tailed deer on an industrial forest following decline in population density	Crimmins	2009	2010	2009.5	2006	Proc 18th Central Hardwoods Forest Conf	0	0	487	476	Artiodactyla	Cervidae	Odocoileus	virginianus	75000	1.84	Adult	38.7614	-79.6698	18	18	12	12	0	0
Survival estimates of white-tailed deer fawns at Fort Rucker, Alabama	Jackson	2009	2010	2009.5	2011	Thesis: Auburn University	0	0	1	62	Artiodactyla	Cervidae	Odocoileus	virginianus	75000	1.84	Adult	31.3329	-85.7267	5	3	1	1	0	0
Factors affecting survival of adult female white-tailed deer after coyote establishment in South Carolina	Kilgo	2006	2013	2009.5	2016	Wildlife Society Bulletin	40	4	747	753	Artiodactyla	Cervidae	Odocoileus	virginianus	75000	1.84	Adult	33.2025	-81.5518	30	23	23	14	8	0
Survival estimates of white-tailed deer fawns at Fort Rucker, Alabama	Jackson	2009	2010	2009.5	2011	Thesis: Auburn University	0	0	1	62	Artiodactyla	Cervidae	Odocoileus	virginianus	75000	1.84	Juvenile	31.3329	-85.7267	7	7	0	0	0	7
Coyote and Bobcat predation on white-tailed deer fawns in a longleaf pine ecosystem in southwestern Georgia	Nelson	2007	2012	2009.5	2015	Journal of the Southeastern Association of Fish and Wildlife Agencies	2	0	208	213	Artiodactyla	Cervidae	Odocoileus	virginianus	75000	1.84	Juvenile	31.2524	-84.3748	21	17	0	0	0	16
Population characteristics of a white-tailed deer herd in an industrial pine forest of North-central Louisiana	Harrelson	2009	2010	2009.5	2011	Thesis: Louisiana State University	0	0	1	32	Artiodactyla	Cervidae	Odocoileus	hemionus	83800	1.99	Adult	32.9138	-92.3492	28	22	22	22	0	0
Demographic Characteristics of Elk in the Glass Mountains, Texas	Pohler	2009	2010	2009.5	2014	Wildlife Biology	38	3	466	472	Artiodactyla	Cervidae	Cervus	elaphus	240000	50.5	Adult	31.2911	-104.429	1	1	1	1	0	0
Ecology and Population Dynamics of Black Bears in Minnesota	Garshelis	2009	2010	2009.5	2013	Summaries of Research Findings	0	0	356	362	Carnivora	Ursidae	Ursus	arctos	196000	282	Adult	47.7344	-93.8249	283	279	272	229	12	0
Ecology and Population Dynamics of Black Bears in Minnesota	Garshelis	2009	2010	2009.5	2013	Summaries of Research Findings	0	0	356	362	Carnivora	Ursidae	Ursus	arctos	196000	282	Adult	46.1703	-94.4375	27	25	22	12	8	0
Ecology and Population Dynamics of Black Bears in Minnesota	Garshelis	2009	2010	2009.5	2013	Summaries of Research Findings	0	0	356	362	Carnivora	Ursidae	Ursus	arctos	196000	282	Adult	48.377	-92.7827	21	21	17	15	1	0
Ecology and Population Dynamics of Black Bears in Minnesota	Garshelis	2009	2010	2009.5	2013	Summaries of Research Findings	0	0	356	362	Carnivora	Ursidae	Ursus	arctos	196000	282	Adult	48.5691	-96.1866	13	10	10	9	1	0
Movements, survival and sightability of white-tailed deer in southeastern South Dakota	Haffley	2009	2011	2010	2013	Thesis: South Dakota State University	0	0	1	81	Artiodactyla	Cervidae	Odocoileus	virginianus	75000	1.84	Adult	43.0175	-97.5279	19	17	16	9	7	0
White-tailed deer habitat use, movements, and reproduction at Barksdale Air force Base, Louisiana	Hasapes	2009	2011	2010	2012	Thesis: Stephen F. Austin State	0	0	1	184	Artiodactyla	Cervidae	Odocoileus	virginianus	75000	1.84	Adult	32.5136	-93.6418	9	9	9	9	0	0
Effects of Maternal Nutrition, Resource Use and Multi-Predator Risk on Neonatal White-Tailed Deer Survival	Duquette	2009	2011	2010	2014	Plos One	9	6	0	0	Artiodactyla	Cervidae	Odocoileus	virginianus	75000	1.84	Juvenile	45.7166	-87.1415	65	56	0	0	0	56
White-tailed deer habitat use, movements, and reproduction at Barksdale Air force Base, Louisiana	Hasapes	2009	2011	2010	2012	Thesis: Stephen F. Austin State	0	0	1	184	Artiodactyla	Cervidae	Odocoileus	virginianus	75000	1.84	Juvenile	32.5136	-93.6418	6	6	0	0	0	5
Rocky Mountain bighorn sheep winter habitat selection and seasonal movements in an area of active coal mining	Poole	2009	2011	2010	2016	Canadian Journal of Zoology	94	11	773	745	Artiodactyla	Bovidae	Ovis	canadensis	74600	16.2	Adult	49.9759	-114.76	11	11	1	0	1	2
Preserving a Natural Wolf Population in Yellowstone National Park, USA	Povilitis	2008	2012	2010	2015	The George Wright Forum	32	1	35	34	Carnivora	Canidae	Canis	lupus	35000	21.8	Adult	44.4521	-110.601	73	73	26	14	0	0
Big enough for bears? American black bears at heightened risk of mortality during seasonal forays outside Algonquin Provincial Park, Ontario	Obbard	2006	2014	2010	2017	Ursus	28	2	182	194	Carnivora	Ursidae	Ursus	americanus	111000	27.9	Adult	45.7962	-78.3238	21	21	18	14	1	0
Movements, activity patterns, and habitat use of snowshoe hares in interior Alaska	Feierabend	2008	2013	2010.5	2014	Journal of Mammalogy	95	3	525	533	Lagomorpha	Leporidae	Lepus	americanus	1570	0.03	Adult	64.7007	-148.353	229	177	0	0	0	169
Resource selection and survival of female white-tailed deer in an agricultural landscape	Miller	2010	2011	2010.5	2012	Thesis: University of Delaware	0	0	1	47	Artiodactyla	Cervidae	Odocoileus	virginianus	75000	1.84	Adult	38.7382	-75.4109	20	20	19	16	3	0
An Evaluation of life history parameters of white-tailed deer in North Dakota	Schaffer	2010	2011	2010.5	2013	Thesis: South Dakota State University	0	0	1	74	Artiodactyla	Cervidae	Odocoileus	virginianus	75000	1.84	Adult	47.3069	-100.078	21	13	9	6	3	3
Effects of calf predation and nutrition on elk vital rates	Tatman	2009	2012	2010.5	2018	The Journal of Wildlife Management	82	7	1417	1428	Artiodactyla	Cervidae	Cervus	elaphus	240000	50.5	Juvenile	36.6314	-104.144	159	130	3	3	0	123
Investigations into possible factors affecting the recruitment of Rocky Mountain Elk on the Valles Caldera National Preserve	Bernal	2009	2012	2010.5	2013	Thesis: Texas Tech University	0	0	1	102	Artiodactyla	Cervidae	Cervus	elaphus	240000	50.5	Juvenile	35.9198	-106.512	64	58	1	0	1	55
Ecology of the swamp rabbit and eastern cottontail in bottomland hardwood forests in southern Illinois	Crawford	2009	2013	2011	2014	Thesis: Southern Illinois University Carbondale	0	0	1	115	Lagomorpha	Leporidae	Sylvilagus	aquaticus	2140	0.01	Adult	37.2794	-89.0967	95	83	6	6	0	69
Ecology of the swamp rabbit and eastern cottontail in bottomland hardwood forests in southern Illinois	Crawford	2009	2013	2011	2014	Thesis: Southern Illinois University Carbondale	0	0	1	115	Lagomorpha	Leporidae	Sylvilagus	floridanus	1210	0.01	Adult	37.2794	-89.0967	53	44	39	37	2	2
Camouflage mismatch in seasonal coat color due to decreased snow duration: will snowshoe hares keep up with climate change?	Zimova	2010	2012	2011	2014	Thesis: University of Montana	0	0	1	93	Lagomorpha	Leporidae	Lepus	americanus	1570	0.03	Adult	45.3145	-111.099	148	148	0	0	0	124
Movement patterns, survival and sightability of white-tailed deer in eastern South Dakota	Robling	2010	2012	2011	2011	Thesis: South Dakota State University	0	0	1	153	Artiodactyla	Cervidae	Odocoileus	virginianus	75000	1.84	Adult	44.9173	-97.7371	17	15	11	11	0	2
Mule Deer (Odocoileus hemionus) Movement and Habitat Use Patterns in Relation to Roadways in Northwest Wyoming	Riginos	2010	2012	2011	2013	Wyoming Dept of Transportation Report FHWA-WY-13/08F	0	0	1	72	Artiodactyla	Cervidae	Odocoileus	hemionus	83800	1.99	Adult	43.8164	-110.605	10	10	6	0	6	1
Movement patterns, survival and sightability of mule deer in central and western South Dakota	Robling	2010	2012	2011	2014	Game Report- SD Dept of Game, Fish and Parks	0	0	1	82	Artiodactyla	Cervidae	Odocoileus	hemionus	83800	1.99	Adult	44.525	-102.167	28	12	9	9	0	0
Effects of predation and forage availability on the survival of black-tailed deer in the Mendocino National Forest, California	Forrester	2009	2013	2011	2014	Thesis: University of California Davis	0	0	1	134	Artiodactyla	Cervidae	Odocoileus	hemionus	83800	1.99	Juvenile	39.6936	-122.641	95	68	0	0	0	64
Assessment of mule deer fawn survival and birth site attributes in south-central Oregon	Speten	2010	2012	2011	2015	Thesis: Oregon State University	0	0	1	70	Artiodactyla	Cervidae	Odocoileus	hemionus	83800	1.99	Juvenile	42.8689	-121.552	74	61	4	2	1	52
Disease and predation: sorting out causes of a bighorn sheep decline	Smith	2010	2012	2011	2014	Plos One	9	2	0	0	Artiodactyla	Bovidae	Ovis	canadensis	74600	16.2	Juvenile	44.1055	-103.037	70	63	1	0	1	21
Temporal, spatial and environmental influences on the Demographics and Harvest Vulnerability of American Black Bears in Urban Habitats in New Jersey, Pennsylvania and West Virginia	Tri	2010	2012	2011	2013	Thesis: West Virginia University	0	0	1	195	Carnivora	Ursidae	Ursus	americanus	111000	27.9	Adult	38.2952	-81.6415	2	2	2	1	1	0
Temporal, spatial and environmental influences on the Demographics and Harvest Vulnerability of American Black Bears in Urban Habitats in New Jersey, Pennsylvania and West Virginia	Tri	2010	2012	2011	2013	Thesis: West Virginia University	0	0	1	195	Carnivora	Ursidae	Ursus	americanus	111000	27.9	Adult	41.0828	-74.5795	4	4	2	2	0	0
Temporal, spatial and environmental influences on the Demographics and Harvest Vulnerability of American Black Bears in Urban Habitats in New Jersey, Pennsylvania and West Virginia	Tri	2010	2012	2011	2013	Thesis: West Virginia University	0	0	1	195	Carnivora	Ursidae	Ursus	americanus	111000	27.9	Adult	40.3692	-78.943	33	33	25	17	8	0
Temporal, spatial and environmental influences on the Demographics and Harvest Vulnerability of American Black Bears in Urban Habitats in New Jersey, Pennsylvania and West Virginia	Tri	2010	2012	2011	2013	Thesis: West Virginia University	0	0	1	195	Carnivora	Ursidae	Ursus	americanus	111000	27.9	Juvenile	38.2952	-81.6415	3	3	2	2	0	0
Temporal, spatial and environmental influences on the Demographics and Harvest Vulnerability of American Black Bears in Urban Habitats in New Jersey, Pennsylvania and West Virginia	Tri	2010	2012	2011	2013	Thesis: West Virginia University	0	0	1	195	Carnivora	Ursidae	Ursus	americanus	111000	27.9	Juvenile	41.0828	-74.5795	2	2	0	0	0	0
Temporal, spatial and environmental influences on the Demographics and Harvest Vulnerability of American Black Bears in Urban Habitats in New Jersey, Pennsylvania and West Virginia	Tri	2010	2012	2011	2013	Thesis: West Virginia University	0	0	1	195	Carnivora	Ursidae	Ursus	americanus	111000	27.9	Juvenile	40.3692	-78.943	2	2	2	0	2	0
Beaver Ecology in Bridge Creek, a Tributary to the John Day River	Maenhout	2011	2012	2011.5	2013	Thesis: Oregon State University	0	0	1	79	Rodentia	Castoridae	Castor	canadensis	18100	0.05	Adult	44.7345	-120.305	2	1	1	1	0	0
Survival and Home-range size of Southeastern Fox Squirrels in North Carolina	Prince	2011	2012	2011.5	2014	The Southeastern Naturalist	13	3	456	462	Rodentia	Sciuridae	Sciurus	niger	-999	0.2	Adult	35.124	-79.0427	22	10	2	2	0	8
Do Biological and Bedsite Characteristics Influence Survival of neonatal white-tailed deer?	Chitwood	2011	2012	2011.5	2015	Plos One	10	3	0	0	Artiodactyla	Cervidae	Odocoileus	virginianus	75000	1.84	Juvenile	35.1486	-78.9843	55	55	1	0	1	35
Mule Deer Demographics and Partruition Site Selection: Assessing Reponses to Provision of Water	Bush	2009	2014	2011.5	2015	Thesis: University of Nevada Reno	0	0	1	96	Artiodactyla	Cervidae	Odocoileus	hemionus	83800	1.99	Adult	35.0106	-115.472	25	11	2	0	2	8
Behavior and Cause-specific mortality of mule deer fawns on the national rifle association Whittington center of North-central New Mexico	Taylor	2011	2012	2011.5	2012	Thesis: Texas Tech University	0	0	1	91	Artiodactyla	Cervidae	Odocoileus	hemionus	83800	1.99	Juvenile	36.7772	-104.495	37	35	1	0	1	33
The role of parasites, diseases, mineral levels, and low fawn survival in a declining pronghorn population in the Trans-pecos region of Texas	Weaver	2011	2012	2011.5	2013	Thesis: Sul Ross State University	0	0	1	96	Artiodactyla	Antilocapridae	Antilocapra	americana	46900	9.68	Juvenile	30.5401	-104.518	50	47	0	0	0	45
Survival of female bighorn sheep (Ovis canadensis) in the Black Hills, South Dakota	Smith	2010	2013	2011.5	2015	The American Midland Natrualist	174	2	290	301	Artiodactyla	Bovidae	Ovis	canadensis	74600	16.2	Adult	43.9887	-103.605	21	11	1	0	1	4
Survival and cause-specific mortality of coyotes on a large military installation	Stevenson	2011	2012	2011.5	2016	The Southeastern Naturalist	15	3	459	466	Carnivora	Canidae	Canis	latrans	12000	16.8	Adult	35.1267	-79.0324	3	1	1	1	0	0
Survival and cause-specific mortality of coyotes on a large military installation	Stevenson	2011	2012	2011.5	2016	The Southeastern Naturalist	15	3	459	466	Carnivora	Canidae	Canis	latrans	12000	16.8	Juvenile	35.1267	-79.0324	4	3	3	1	2	0
Wisconsin Deer Research Studies Annual Report 2013-2014	Storm	2010	2014	2012	2014	Wisconsin Dept of Natural Resources	0	0	1	19	Artiodactyla	Cervidae	Odocoileus	virginianus	75000	1.84	Adult	45.6606	-91.17	24	24	15	13	2	6
Wisconsin Deer Research Studies Annual Report 2013-2014	Storm	2010	2014	2012	2014	Wisconsin Dept of Natural Resources	0	0	1	19	Artiodactyla	Cervidae	Odocoileus	virginianus	75000	1.84	Adult	44.6518	-88.7542	25	23	21	17	3	0
Wisconsin Deer Research Studies Annual Report 2013-2014	Storm	2010	2014	2012	2014	Wisconsin Dept of Natural Resources	0	0	1	19	Artiodactyla	Cervidae	Odocoileus	virginianus	75000	1.84	Juvenile	44.6518	-88.7542	65	63	30	21	9	6
Wisconsin Deer Research Studies Annual Report 2013-2014	Storm	2010	2014	2012	2014	Wisconsin Dept of Natural Resources	0	0	1	19	Artiodactyla	Cervidae	Odocoileus	virginianus	75000	1.84	Juvenile	45.6606	-91.17	83	83	21	17	4	49
Increased overwinter mortalities of white-tailed deer (Odocoileus virginianus) fawns during a drought year	Tosa	2010	2014	2012	2017	Canadian Journal of Zoology	96	1	55	61	Artiodactyla	Cervidae	Odocoileus	virginianus	75000	1.84	Juvenile	37.6918	-89.0655	10	8	2	0	2	6
Cause-Speci?c Neonatal Mortality of White-Tailed Deer in Wisconsin, USA	Warbington	2011	2013	2012	2017	The Journal of Wildlife Management	81	5	824	833	Artiodactyla	Cervidae	Odocoileus	virginianus	75000	1.84	Juvenile	45.6388	-90.5904	42	37	0	0	0	35
Cause-Speci?c Neonatal Mortality of White-Tailed Deer in Wisconsin, USA	Warbington	2011	2013	2012	2017	The Journal of Wildlife Management	81	5	824	833	Artiodactyla	Cervidae	Odocoileus	virginianus	75000	1.84	Juvenile	44.7035	-88.8009	43	40	4	0	4	15
Metapopulation dynamics and space use by reintroduced elk (Cervus elaphus) in central Ontario	McGeachy	2011	2013	2012	2016	Canadian Journal of Zoology	95	3	149	159	Artiodactyla	Cervidae	Cervus	elaphus	240000	50.5	Adult	46.2264	-80.8479	9	8	4	0	0	4
Endemic chronic wasting disease causes mule deer population decline in Wyoming	DeVivo	2010	2014	2012	2017	Plos One	12	10	0	0	Artiodactyla	Cervidae	Cervus	elaphus	240000	50.5	Adult	42.6641	-105.572	47	47	10	6	3	21
Population dynamics model to inform harvest management of a small elk herd in central New Mexico	DeVore	2011	2013	2012	2018	Journal of Fish and Wildlife Management	9	2	531	544	Artiodactyla	Cervidae	Cervus	elaphus	240000	50.5	Adult	33.8252	-106.907	7	7	7	7	0	0
Home Range, Survival, and Activity Patterns of the Southeastern Pocket Gopher: Implications for Translocation	Warren	2012	2013	2012.5	2017	Journal of Fish and Wildlife Management	8	2	544	557	Rodentia	Geomyidae	Geomys	pinetis	201	-999	Adult	31.2208	-84.4768	2	2	0	0	0	2
Short-tailed weasel space use in managed forests of Western Oregon	Linnell	2012	2013	2012.5	2014	Thesis: Oregon State University	0	0	1	88	Carnivora	Mustelidae	Mustela	erminea	284	0.11	Adult	44.6584	-123.239	8	5	0	0	0	5
Coyote predation effects on white-tailed deer fawns	Watine	2012	2013	2012.5	2016	Natural Resources	7	0	628	643	Artiodactyla	Cervidae	Odocoileus	virginianus	75000	1.84	Juvenile	30.7181	-83.7154	20	20	0	0	0	19
Ecology of adult female Rocky Mountain mule deer following habitat enhancements in north-central New Mexico	Sorensen	2011	2014	2012.5	2015	Thesis: Texas Tech University	0	0	1	179	Artiodactyla	Cervidae	Odocoileus	hemionus	83800	1.99	Adult	36.7708	-104.501	28	26	2	0	1	22
Dall sheep demographics: A peek and intrinsic and extrinsic effects	Boan	2012	2013	2012.5	2014	Thesis: University of Nevada Reno	0	0	1	65	Artiodactyla	Bovidae	Ovis	dalli	69600	10	Adult	61.4428	-150.159	10	10	0	0	0	4
Dall sheep demographics: A peek and intrinsic and extrinsic effects	Boan	2012	2013	2012.5	2014	Thesis: University of Nevada Reno	0	0	1	65	Artiodactyla	Bovidae	Ovis	dalli	69600	10	Juvenile	61.4428	-150.159	14	14	0	0	0	11
Desert Bighorn Sheep Lambing habitat: Parturition, Nursery and Predation Sites	Karsch	2012	2013	2012.5	2016	The Journal of Wildlife Management	80	6	1069	1080	Artiodactyla	Bovidae	Ovis	canadensis	74600	16.2	Juvenile	32.0104	-108.951	14	12	0	0	0	12
Population Ecology of Rocky Mountain Elk in the Black Hills, South Dakota and Wyoming	Simpson	2012	2013	2012.5	2015	Thesis: South Dakota State University	0	0	1	156	Artiodactyla	Cervidae	Rangifer	tarandus	108000	2400	Adult	44.1177	-103.964	12	11	7	7	0	2
Population Ecology of Rocky Mountain Elk in the Black Hills, South Dakota and Wyoming	Simpson	2012	2013	2012.5	2015	Thesis: South Dakota State University	0	0	1	156	Artiodactyla	Cervidae	Rangifer	tarandus	108000	2400	Juvenile	44.1177	-103.964	16	15	1	0	1	13
Mortality of mule deer fawns in a natural gas development area	Peterson	2012	2014	2013	2018	The Journal of Wildlife Management	82	6	1135	1148	Artiodactyla	Cervidae	Odocoileus	hemionus	83800	1.99	Juvenile	39.9554	-107.533	30	25	0	0	0	22
Mortality of mule deer fawns in a natural gas development area	Peterson	2012	2014	2013	2018	The Journal of Wildlife Management	82	6	1135	1148	Artiodactyla	Cervidae	Odocoileus	hemionus	83800	1.99	Juvenile	39.5736	-108.325	77	64	1	0	1	59
Desert Kit fox survival, southeastern California	Randel	2012	2014	2013	2016	Mammal Study	41	1	43	46	Carnivora	Canidae	Vulpes	macrotis	2140	6.51	Adult	33.6806	-115.411	15	12	1	0	1	11
Population dynamics of a bighorn sheep herd in the Souther Black Hills of South Dakota and Wyoming	Parr	2012	2014	2013	2018	The American Midland Natrualist	179	1	1	14	Artiodactyla	Bovidae	Ovis	canadensis	74600	16.2	Adult	44.1177	-103.964	6	4	1	1	0	3
Survival and Cause-Specific Mortality of Desert Bighorn Sheep Lambs	Cain	2012	2014	2013	2019	The Journal of Wildlife Management	83	2	251	259	Artiodactyla	Bovidae	Ovis	canadensis	74600	16.2	Juvenile	31.603	-108.926	14	13	0	0	0	12
Assessing timing and causes of neonatal lamb losses in a bighorn sheep herd via use of vaginal implant transmitters	Grigg	2013	2013	2013	2017	Journal of Wildlife Diseases	53	3	596	601	Artiodactyla	Bovidae	Ovis	canadensis	74600	16.2	Juvenile	39.0854	-106.179	12	12	0	0	0	1
Population dynamics of a bighorn sheep herd in the Souther Black Hills of South Dakota and Wyoming	Parr	2012	2014	2013	2018	The American Midland Natrualist	179	1	1	14	Artiodactyla	Bovidae	Ovis	canadensis	74600	16.2	Juvenile	44.1177	-103.964	20	19	0	0	0	7
Meningeal worm as a cause of mortality in restored elk population in Missouri, USA	Chitwood	2011	2015	2013	2018	Journal of Wildlife Diseases	54	1	95	100	Artiodactyla	Cervidae	Cervus	elaphus	240000	50.5	Adult	37.1732	-90.8919	31	12	1	0	1	0
Survival and cause-specific mortality of elk in Kentucky, USA	Slabach	2011	2015	2013	2018	Wildlife Biology	2018	1	1	9	Artiodactyla	Cervidae	Cervus	elaphus	240000	50.5	Adult	37.5446	-83.1308	155	152	140	133	4	0
Meningeal worm as a cause of mortality in restored elk population in Missouri, USA	Chitwood	2011	2015	2013	2018	Journal of Wildlife Diseases	54	1	95	100	Artiodactyla	Cervidae	Cervus	elaphus	240000	50.5	Juvenile	37.1732	-90.8919	47	35	0	0	0	5
Pumas Affect Elk Dynamics in Absence of Other Large Carnivores	Lehman	2011	2015	2013	2018	The Journal of Wildlife Management	82	2	344	353	Artiodactyla	Cervidae	Cervus	elaphus	240000	50.5	Adult	43.6351	-103.829	18	17	10	8	2	5
Pumas Affect Elk Dynamics in Absence of Other Large Carnivores	Lehman	2011	2015	2013	2018	The Journal of Wildlife Management	82	2	344	353	Artiodactyla	Cervidae	Cervus	elaphus	240000	50.5	Juvenile	43.6351	-103.829	73	72	0	0	0	69
Spatial variability in abundance, detectability and survival of white-tailed deer across a heterogeneous landscape of fear	Kilburn	2012	2015	2013.5	2018	Thesis: University of Connecticut	0	0	1	83	Artiodactyla	Cervidae	Odocoileus	virginianus	75000	1.84	Juvenile	41.8766	-72.1942	58	54	12	5	0	35
Survival of neonatal mule deer fawns in southern Utah: effects of coyote removal and synchrony of parturition	Hall	2012	2015	2013.5	2018	Thesis: Brigham Young University	0	0	1	61	Artiodactyla	Cervidae	Odocoileus	hemionus	83800	1.99	Juvenile	38.4729	-112.04	113	84	2	0	2	69
Assessing calf survival and the quantitative impact of reproductive success on the declining moose population in northeastern Minnesota	Severud	2013	2014	2013.5	2017	Thesis: University of Minnesota	0	0	1	123	Artiodactyla	Cervidae	Alces	alces	481000	64.2	Juvenile	47.3065	-91.4525	31	31	0	0	0	26
Survival of adult white-tailed deer and movement relative to temporal patterns of predation risk	Wiskirchen	2013	2015	2014	2017	Thesis: Auburn University	0	0	1	90	Artiodactyla	Cervidae	Odocoileus	virginianus	75000	1.84	Adult	32.9504	-87.4636	31	28	23	23	0	0
Survival of White-Tailed Deer Neonates in Louisiana	Shuman	2013	2015	2014	2017	The Journal of Wildlife Management	81	5	834	845	Artiodactyla	Cervidae	Odocoileus	virginianus	75000	1.84	Juvenile	32.3358	-91.396	51	50	0	0	0	45
Swift fox monitoring in southwestern South Dakota (Badlands National Park and Buffalo Gap National Grassland)	Nevison	2014	2014	2014	2015	Swift fox conservation team: report for 2013-2014 CO Div of Parks and Wildlife	0	0	46	49	Carnivora	Canidae	Vulpes	velox	2140	6.51	Adult	43.8414	-102.314	13	12	8	0	8	4
Dangerous misperceptions with consequences: survival of eastern cottontails on restored grasslands surrounded by agriculture	Nawrocki	2014	2015	2014.5	2017	Thesis: University of Illinois at Urbana-Champaign	0	0	1	48	Lagomorpha	Leporidae	Sylvilagus	floridanus	1210	0.01	Adult	40.5669	-88.3713	48	48	3	0	3	45
Ecology, habitat use, and winter thermal dynamics of snowshoe hares in Pennsylvania	Gigliotti	2014	2015	2014.5	2016	Thesis: Pennsylvania State University	0	0	1	89	Lagomorpha	Leporidae	Lepus	americanus	1570	0.03	Adult	41.0294	-75.421	30	30	3	3	0	22
Impact of recolonizing gray wolves on survival and mortality in two sympatric ungulates	Dellinger	2013	2016	2014.5	2018	Canadian Journal of Zoology	96	0	760	768	Artiodactyla	Cervidae	Odocoileus	virginianus	75000	1.84	Adult	48.5501	-119.262	21	20	10	10	0	10
Assessing factors affect ing adult female white-tailed deer survival in the Northern Great Plains	Moratz	2014	2015	2014.5	2018	Wildlife Research	45	0	679	684	Artiodactyla	Cervidae	Odocoileus	virginianus	75000	1.84	Adult	45.7077	-102.414	31	24	8	6	2	11
Effect of oil and gas development on survival and health of white-tailed deer in the western Dakotas	Moratz	2014	2015	2014.5	2016	Thesis: South Dakota State University	0	0	1	147	Artiodactyla	Cervidae	Odocoileus	virginianus	75000	1.84	Juvenile	46.1807	-101.687	18	15	2	2	0	12
Effect of oil and gas development on survival and health of white-tailed deer in the western Dakotas	Moratz	2014	2015	2014.5	2016	Thesis: South Dakota State University	0	0	1	147	Artiodactyla	Cervidae	Odocoileus	virginianus	75000	1.84	Juvenile	47.1067	-102.949	11	10	1	1	0	7
Effect of oil and gas development on survival and health of white-tailed deer in the western Dakotas	Moratz	2014	2015	2014.5	2016	Thesis: South Dakota State University	0	0	1	147	Artiodactyla	Cervidae	Odocoileus	virginianus	75000	1.84	Juvenile	45.6	-102.445	15	12	1	1	0	8
Impact of recolonizing gray wolves on survival and mortality in two sympatric ungulates	Dellinger	2013	2016	2014.5	2018	Canadian Journal of Zoology	96	0	760	768	Artiodactyla	Cervidae	Odocoileus	hemionus	83800	1.99	Adult	48.5501	-119.262	20	18	6	6	0	12
Shifts in strategy: Calving and survival in a partially migratory elk population	Berg	2013	2016	2014.5	2019	Thesis: University of Alberta	0	0	1	261	Artiodactyla	Cervidae	Cervus	elaphus	240000	50.5	Juvenile	51.6079	-115.269	57	49	0	0	0	48
Survival and Cause-Specific Mortality of White-Tailed Deer Neonates in a Southeastern Kentucky Population	McDermott	2014	2016	2015	2017	Thesis: University of Kentucky	0	0	1	58	Artiodactyla	Cervidae	Odocoileus	virginianus	75000	1.84	Juvenile	37.2372	-83.5827	35	35	4	0	2	27
Spatial and temporal patterns in whte-tailed deer fawn survival and cause-specific mortality	Gingery	2015	2016	2015.5	2018	Thesis: Pennsylvania State University	0	0	1	122	Artiodactyla	Cervidae	Odocoileus	virginianus	75000	1.84	Juvenile	40.7107	-77.7464	10	9	3	2	1	6
Spatial and temporal patterns in whte-tailed deer fawn survival and cause-specific mortality	Gingery	2015	2016	2015.5	2018	Thesis: Pennsylvania State University	0	0	1	122	Artiodactyla	Cervidae	Odocoileus	virginianus	75000	1.84	Juvenile	41.5035	-77.6765	22	21	1	1	0	20
Survival, space use and radio telemetry accuracy of white-tailed deer fawns in central Iowa	Mcgovern	2015	2017	2016	2018	Thesis: Iowa State University	0	0	1	68	Artiodactyla	Cervidae	Odocoileus	virginianus	75000	1.84	Juvenile	41.9897	-93.8783	21	18	4	3	1	4
Survival, movements and resource selection of female white-tailed deer in Missouri	Wright	2015	2017	2016	2018	Thesis: University of Montana	0	0	1	211	Artiodactyla	Cervidae	Odocoileus	virginianus	75000	1.84	Juvenile	40.1367	-94.6395	63	22	3	0	1	14
Survival, movements and resource selection of female white-tailed deer in Missouri	Wright	2015	2017	2016	2018	Thesis: University of Montana	0	0	1	211	Artiodactyla	Cervidae	Odocoileus	virginianus	75000	1.84	Juvenile	36.916	-92.0125	62	23	2	0	0	16
Neonatal survival and spatial ecology of adult female white-tailed deer in the functional absence of predators	Dion	2016	2017	2016.5	2018	Thesis: University of Delaware	0	0	1	65	Artiodactyla	Cervidae	Odocoileus	virginianus	75000	1.84	Juvenile	38.7439	-75.3801	42	35	0	0	0	0
